# Supplementary material for: Impacts of COVID-19 on Trade and Economic Aspects of Food Security: Evidence from 45 Developing Countries
Source: PubMed Central journal article supplement (PMC7459461; doi:10.3390/ijerph17165775), 2020-08-10
Supplement: ijerph-17-05775-s001.pdf [file ijerph-17-05775-s001.pdf]

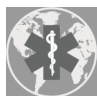

**Table S1.** ADF and PP tests results, Group 1.

| Country                    | Parameters           | Y       | X <sub>1</sub> | X <sub>2</sub> | X <sub>3</sub> | X <sub>4</sub> |
|----------------------------|----------------------|---------|----------------|----------------|----------------|----------------|
| Afghanistan                | ADF level            | -2.68** | -3.72          | -1.98**        | -3.81**        | -4.13          |
|                            | ADF first difference | -3.21** | -3.60*         | -3.00**        | -2.88**        | -3.85**        |
|                            | PP level             | -2.53*  | -3.69          | -2.03**        | -3.17**        | -4.05*         |
|                            | PP first difference. | -2.67*  | -3.44*         | -2.76**        | -2.74**        | -3.77**        |
| Burkina Faso               | ADF level            | -0.45** | -2.83**        | -0.28*         | -2.90**        | -4.88**        |
|                            | ADF first difference | -2.06** | -3.51*         | -2.09          | -2.72**        | -3.95**        |
|                            | PP level             | -0.56** | -2.44**        | -0.62**        | -2.85**        | -4.69**        |
|                            | PP first difference. | -2.09** | -3.17*         | -2.16          | -2.59**        | -3.76**        |
| Chad                       | ADF level            | -3.54   | -2.88**        | -4.17**        | -2.44          | -3.31          |
|                            | ADF first difference | -2.86** | -0.74**        | -3.85**        | -0.95**        | -2.49*         |
|                            | PP level             | -3.92   | -2.61**        | -4.01**        | -2.18          | -3.17          |
|                            | PP first difference. | -2.03** | -0.52**        | -3.96**        | -0.06**        | -2.65*         |
| Congo, Democratic Republic | ADF level            | -1.05** | -4.13*         | -3.33          | -2.97**        | -3.88**        |
|                            | ADF first difference | -2.55** | -3.75**        | -2.47**        | -3.06**        | -2.55**        |
|                            | PP level             | -1.42** | -4.01*         | -3.52*         | -2.44**        | -3.53**        |
|                            | PP first difference. | -2.08** | -3.59**        | -2.04**        | -3.18**        | -2.47**        |
| Ethiopia                   | ADF level            | -3.46** | -1.05**        | -2.74*         | -5.66*         | -4.86**        |
|                            | ADF first difference | -2.09** | -2.15**        | -3.06*         | -4.99**        | -4.05**        |
|                            | PP level             | -3.52** | -1.11**        | -2.67*         | -5.05*         | -4.09**        |
|                            | PP first difference. | -2.18** | -2.19**        | -2.98*         | -4.84**        | -3.98**        |
| Guinea                     | ADF level            | -3.55*  | -3.17          | -4.14**        | -3.95**        | -2.19*         |
|                            | ADF first difference | -2.97** | -2.98**        | -5.05*         | -3.28**        | -3.06**        |
|                            | PP level             | -3.42*  | -3.05          | -4.19**        | -3.66**        | -2.35*         |
|                            | PP first difference. | -2.80** | -2.87**        | -4.96*         | -3.14**        | -2.77**        |
| Haiti                      | ADF level            | -5.17   | -4.88**        | -3.48**        | -2.17**        | -0.15**        |
|                            | ADF first difference | -3.19*  | -3.10**        | -2.87**        | -3.42*         | -2.34**        |
|                            | PP level             | -4.89   | -4.67**        | -3.55**        | -2.53**        | -0.32**        |
|                            | PP first difference. | -3.54*  | -3.14**        | -2.80**        | -3.18*         | -2.30**        |
| Mali                       | ADF level            | -2.18** | -2.15**        | -0.88*         | -2.16          | -1.85*         |
|                            | ADF first difference | -3.66** | -3.96**        | -2.05**        | -1.98*         | -2.06**        |
|                            | PP level             | -2.01** | -2.12**        | -0.96*         | -2.19*         | -1.82*         |
|                            | PP first difference. | -3.12** | -3.87**        | -2.03**        | -1.77*         | -2.14**        |
| Mozambique                 | ADF level            | -0.97   | -1.54*         | -1.09**        | -2.55**        | -1.87          |
|                            | ADF first difference | -0.45*  | -2.67**        | -2.14**        | -1.98**        | -2.09**        |
|                            | PP level             | -1.20   | -1.49*         | -1.07**        | -2.76**        | -1.23          |
|                            | PP first difference. | -0.91*  | -2.06**        | -2.19**        | -1.85**        | -2.34**        |
| Nepal                      | ADF level            | -1.02** | -0.68**        | -1.85*         | -2.04*         | -1.99*         |
|                            | ADF first difference | -2.28** | -1.84**        | -2.09**        | -0.16**        | -1.55**        |
|                            | PP level             | -1.16** | -0.95**        | -1.66*         | -1.98*         | -1.74*         |
|                            | PP first difference. | -2.00** | -1.66**        | -2.13**        | -0.85**        | -1.37**        |
| Niger                      | ADF level            | -3.18   | -2.63*         | -0.86**        | -2.95**        | -4.32**        |
|                            | ADF first difference | -2.76*  | -1.77**        | -0.75**        | -1.87**        | -3.14**        |
|                            | PP level             | -2.99*  | -2.85*         | -1.04**        | -2.86**        | -4.07**        |
|                            | PP first difference. | -2.84*  | -2.05**        | -0.69**        | -1.84**        | -2.96**        |
| Sierra Leone               | ADF level            | -1.95** | -4.29*         | -1.43*         | -2.93**        | -2.88          |
|                            | ADF first difference | -1.59** | -3.13**        | -2.01**        | -1.19**        | -3.40*         |
|                            | PP level             | -2.02** | -4.18*         | -1.72*         | -2.75**        | -2.39*         |
|                            | PP first difference. | -1.44** | -3.17**        | -2.16**        | -1.63**        | -3.16*         |
| Tajikistan                 | ADF level            | -5.40*  | -2.29**        | -1.08*         | -0.99*         | -1.37**        |
|                            | ADF first difference | -4.43*  | -1.86**        | -2.53**        | -1.85**        | -0.69**        |
|                            | PP level             | -4.97*  | -3.01**        | -1.27*         | -0.74*         | -1.08**        |
|                            | PP first difference. | -4.50*  | -2.35**        | -2.59**        | -1.90**        | -0.70**        |
| Tanzania                   | ADF level            | -0.77** | -1.02*         | -0.55**        | -2.75**        | -1.44*         |
|                            | ADF first difference | -1.20** | -1.47**        | -1.47**        | -1.59**        | -2.00**        |
|                            | PP level             | -0.93** | -1.24*         | -0.68**        | -2.50**        | -1.46*         |
|                            | PP first difference. | -1.34** | -1.56**        | -1.39**        | -1.77**        | -2.09**        |
| Yemen                      | ADF level            | -3.46*  | -2.55**        | -4.94*         | -3.18*         | -5.33**        |
|                            | ADF first difference | -4.28** | -1.48**        | -3.85**        | -2.57          | -6.50**        |
|                            | PP level             | -3.09*  | -2.39**        | -4.28*         | -3.03*         | -5.47**        |
|                            | PP first difference. | -4.00** | -1.90**        | -3.06**        | -2.66          | -6.18**        |

Y = number of people with insufficient food consumption; X<sub>1</sub> = number of confirmed COVID-19 cases; X<sub>2</sub> = balance of food trade; X<sub>3</sub> = food inflation; X<sub>4</sub> = currency exchange; \*, \*\*, \*\*\* = significance at 10% level, 5% level, and 1% level, respectively. Source: authors' development.

Table 2. ADF and PP tests results, Group 2.

| Country       | Parameters           | Y        | X <sub>1</sub> | X <sub>2</sub> | X <sub>3</sub> | X <sub>4</sub> |
|---------------|----------------------|----------|----------------|----------------|----------------|----------------|
| Bangladesh    | ADF level            | -3.86**  | -2.25***       | -3.93**        | -1.49**        | -2.06**        |
|               | ADF first difference | -2.54*   | -1.66**        | -4.60**        | -2.00**        | -1.47**        |
|               | PP level             | -3.03**  | -1.90***       | -3.66**        | -1.37**        | -2.58**        |
| Bolivia       | PP first difference. | -2.38*   | -1.73**        | -4.39**        | -2.14**        | -1.45**        |
|               | ADF level            | -0.77*** | -1.54*         | -1.78*         | -1.12***       | -1.39***       |
|               | ADF first difference | -1.05**  | -2.62**        | -2.04**        | -0.98**        | -0.86**        |
| Cambodia      | PP level             | -0.49*** | -1.39*         | -1.70*         | -1.17***       | -1.27***       |
|               | PP first difference. | -1.08**  | -2.50**        | -1.95**        | -0.95**        | -0.83**        |
|               | ADF level            | -2.84    | -3.06***       | -2.18***       | -2.68*         | -2.74*         |
| Cameroon      | ADF first difference | -3.03**  | -3.19**        | -2.76**        | -1.00*         | -2.59          |
|               | PP level             | -2.88    | -3.13***       | -2.04***       | -2.55*         | -2.70*         |
|               | PP first difference. | -3.12**  | -3.40**        | -2.39**        | -1.06          | -2.68          |
| Cote d'Ivoire | ADF level            | -2.15*** | -2.02*         | -3.14          | -2.75**        | -1.84***       |
|               | ADF first difference | -1.60**  | -1.58**        | -2.05**        | -1.20**        | -2.06**        |
|               | PP level             | -2.19*** | -2.73*         | -3.38*         | -2.27**        | -1.77***       |
| India         | PP first difference. | -1.54**  | -1.42**        | -2.19***       | -1.49**        | -2.18**        |
|               | ADF level            | -4.55*** | -3.09***       | -5.10*         | -3.86***       | -4.04*         |
|               | ADF first difference | -3.16**  | -3.88**        | -4.07**        | -2.85**        | -3.80**        |
| Indonesia     | PP level             | -4.13*** | -3.17***       | -6.11**        | -3.10***       | -4.17*         |
|               | PP first difference. | -3.50**  | -3.50**        | -4.24**        | -2.49**        | -3.75**        |
|               | ADF level            | -0.99*** | -1.04***       | -0.67**        | -1.22**        | -1.73**        |
| Kenya         | ADF first difference | -1.04**  | -1.33**        | -1.64**        | -1.64**        | -1.95***       |
|               | PP level             | -0.75*** | -1.48***       | -0.70**        | -1.48**        | -1.70**        |
|               | PP first difference. | -1.28**  | -1.59**        | -1.53**        | -1.72**        | -1.52***       |
| Kyrgyzstan    | ADF level            | -2.06*   | -3.95*         | -2.59***       | -2.90***       | -3.44**        |
|               | ADF first difference | -2.77**  | -2.27*         | -3.06**        | -3.08**        | -4.03**        |
|               | PP level             | -2.15*   | -3.90*         | -2.63***       | -2.74***       | -3.81**        |
| Nigeria       | PP first difference. | -2.90*   | -2.02**        | -3.11**        | -3.16**        | -4.08**        |
|               | ADF level            | -5.12*** | -4.03***       | -6.40*         | -5.19          | -5.01*         |
|               | ADF first difference | -4.40**  | -3.17**        | -4.13**        | -4.05*         | -4.55*         |
| Pakistan      | PP level             | -6.94*** | -3.08***       | -6.93*         | -4.88          | -4.96*         |
|               | PP first difference. | -4.00**  | -3.54**        | -4.19**        | -4.16*         | -4.97*         |
|               | ADF level            | -2.14**  | -2.05**        | -3.17***       | -2.09***       | -2.15***       |
| Philippines   | ADF first difference | -2.33**  | -3.14*         | -2.99**        | -2.18**        | -2.04**        |
|               | PP level             | -2.09**  | -1.86**        | -3.82***       | -2.66***       | -2.19***       |
|               | PP first difference. | -2.85**  | -3.18*         | -2.70**        | -2.47**        | -2.08**        |
| Tunisia       | ADF level            | -0.47*** | -1.00***       | -0.98***       | -1.03***       | -0.87***       |
|               | ADF first difference | -1.28**  | -1.39**        | -1.21**        | -1.30**        | -1.06**        |
|               | PP level             | -0.96*** | -1.21***       | -0.75***       | -1.09***       | -0.95***       |
| Vietnam       | PP first difference. | -1.14**  | -1.20**        | -1.63**        | -1.24**        | -1.12**        |
|               | ADF level            | -4.44    | -6.02**        | -5.92*         | -3.00*         | -4.83**        |
|               | ADF first difference | -5.60*   | -4.11**        | -4.96**        | -2.95*         | -5.01**        |
| Zambia        | PP level             | -4.17*   | -5.44**        | -4.09**        | -3.15**        | -4.05**        |
|               | PP first difference. | -5.05**  | -4.08**        | -4.00**        | -2.88*         | -5.14**        |
|               | ADF level            | -2.17*** | -2.01***       | -2.84*         | -3.05**        | -2.06**        |
| Zimbabwe      | ADF first difference | -3.03**  | -1.45**        | -3.07**        | -2.57**        | -2.55**        |
|               | PP level             | -2.95*** | -2.26***       | -2.93**        | -2.86**        | -2.19**        |
|               | PP first difference. | -3.11**  | -1.32**        | -3.09**        | -2.69**        | -3.10**        |
| Zimbabwe      | ADF level            | -6.55*   | -5.64*         | -6.58***       | -4.11***       | -5.66**        |
|               | ADF first difference | -5.50**  | -6.08**        | -4.12*         | -5.00**        | -4.04**        |
|               | PP level             | -7.12*   | -5.98*         | -5.26***       | -4.01***       | -4.18**        |
| Zimbabwe      | PP first difference. | -6.02**  | -6.15**        | -4.19*         | -5.17**        | -4.09**        |
|               | ADF level            | -3.15*** | -2.96***       | -3.44*         | -4.04*         | -3.55*         |
|               | ADF first difference | -2.97**  | -1.99**        | -2.77**        | -3.53**        | -3.60**        |
| Zimbabwe      | PP level             | -3.01*** | -2.80***       | -3.86          | -3.99          | -3.04*         |
|               | PP first difference. | -2.88**  | -1.75**        | -2.70**        | -3.07**        | -3.11**        |
|               | ADF level            | -1.06    | -1.22**        | -1.43***       | -1.50***       | -1.94***       |
| Zimbabwe      | ADF first difference | -1.95**  | -2.07***       | -2.58**        | -2.36**        | -2.27**        |
|               | PP level             | -1.20*   | -1.31**        | -1.48***       | -1.67***       | -1.88***       |
|               | PP first difference. | -2.02**  | -2.16***       | -2.47**        | -2.04**        | -2.40**        |

Y = number of people with insufficient food consumption; X<sub>1</sub> = number of confirmed COVID-19 cases; X<sub>2</sub> = balance of food trade; X<sub>3</sub> = food inflation; X<sub>4</sub> = currency exchange; \*, \*\*, \*\*\* = significance at 10% level, 5% level, and 1% level, respectively. Source: authors' development.

Table S3. ADF and PP tests results, Group 3.

| Country            | Parameters           | Y        | X <sub>1</sub> | X <sub>2</sub> | X <sub>3</sub> | X <sub>4</sub> |
|--------------------|----------------------|----------|----------------|----------------|----------------|----------------|
| Algeria            | ADF level            | -0.55*** | -1.24**        | -0.98*         | -1.35**        | -1.01***       |
|                    | ADF first difference | -1.14*** | -1.32***       | -1.05**        | -0.96***       | -1.25**        |
|                    | PP level             | -0.63*** | -1.95**        | -0.87*         | -1.55**        | -1.08***       |
| Botswana           | PP first difference. | -1.30*** | -1.40***       | -1.23**        | -0.70***       | -1.34**        |
|                    | ADF level            | -2.00*   | -2.35*         | -2.44***       | -3.40*         | -2.99**        |
|                    | ADF first difference | -2.88**  | -2.02**        | -3.35**        | -2.96**        | -3.43*         |
| Colombia           | PP level             | -2.17*   | -2.19*         | -2.85***       | -3.12*         | -2.57**        |
|                    | PP first difference. | -2.64**  | -2.40**        | -3.04**        | -2.85**        | -3.28*         |
|                    | ADF level            | -5.55**  | -4.56***       | -3.58*         | -5.63***       | -6.16**        |
| Dominican Republic | ADF first difference | -4.64**  | -3.17**        | -4.55**        | -4.07**        | -5.19**        |
|                    | PP level             | -5.03**  | -4.14***       | -4.00          | -4.99***       | -5.97**        |
|                    | PP first difference. | -4.88**  | -3.95**        | -5.06**        | -5.15**        | -5.08**        |
| Ecuador            | ADF level            | -3.13*** | -2.96*         | -3.75**        | -1.53*         | -2.50*         |
|                    | ADF first difference | -2.94**  | -3.44**        | -2.99**        | -2.01**        | -3.40**        |
|                    | PP level             | -3.05*** | -3.17*         | -2.50**        | -1.66*         | -2.54*         |
| Guatemala          | PP first difference. | -2.76**  | -3.09**        | -3.05**        | -2.43**        | -2.98**        |
|                    | ADF level            | -1.55**  | -0.78***       | -1.21***       | -0.82***       | -1.76***       |
|                    | ADF first difference | -2.73*** | -1.22**        | -2.07**        | -1.34**        | -2.02**        |
| Iran               | PP level             | -1.42**  | -0.84***       | -1.33***       | -0.70***       | -1.56***       |
|                    | PP first difference. | -2.84*** | -1.45**        | -2.38**        | -1.55**        | -2.47**        |
|                    | ADF level            | -0.15    | -0.46*         | -1.06*         | -1.96**        | -1.04*         |
| Iraq               | ADF first difference | -0.90**  | -0.67**        | -1.22**        | -0.95***       | -1.33**        |
|                    | PP level             | -0.34    | -0.39**        | -1.14*         | -1.13**        | -1.25*         |
|                    | PP first difference. | -0.88**  | -0.40**        | -1.35**        | -0.88***       | -1.24**        |
| Jordan             | ADF level            | -2.15*   | -2.94***       | -3.21***       | -1.99**        | -2.17**        |
|                    | ADF first difference | -2.19**  | -1.95**        | -2.76**        | -2.06*         | -2.00*         |
|                    | PP level             | -2.66*   | -2.60***       | -2.18***       | -1.90**        | -2.45**        |
| Lebanon            | PP first difference. | -2.40**  | -1.87**        | -2.59**        | -2.17*         | -2.14**        |
|                    | ADF level            | -5.81*** | -4.44***       | -6.06*         | -4.75**        | -4.18**        |
|                    | ADF first difference | -4.99**  | -4.90**        | -4.00**        | -3.86**        | -3.75*         |
| Libya              | PP level             | -5.36*** | -3.58***       | -6.12*         | -4.70**        | -4.73**        |
|                    | PP first difference. | -4.30**  | -4.51**        | -4.04**        | -3.09**        | -3.84*         |
|                    | ADF level            | -1.15*   | -2.53*         | -1.08**        | -2.39*         | -1.90**        |
| Namibia            | ADF first difference | -2.00**  | -1.97**        | -1.45**        | -1.90***       | -1.47*         |
|                    | PP level             | -1.10    | -2.92          | -1.26**        | -2.44**        | -1.83**        |
|                    | PP first difference. | -2.05**  | -1.83**        | -1.67**        | -1.99**        | -1.55*         |
| Peru               | ADF level            | -3.07*** | -2.59***       | -2.06***       | -3.05*         | -2.18***       |
|                    | ADF first difference | -2.69**  | -2.41**        | -1.95**        | -2.97**        | -2.42**        |
|                    | PP level             | -2.86*** | -2.17***       | -2.94***       | -3.44**        | -2.36***       |
| Sri Lanka          | PP first difference. | -2.50**  | -2.60**        | -1.50**        | -2.40**        | -2.59**        |
|                    | ADF level            | -3.28*   | -3.33          | -3.19          | -5.15***       | -4.44*         |
|                    | ADF first difference | -2.99**  | -4.21*         | -2.28**        | -4.40**        | -3.60**        |
| Turkey             | PP level             | -3.20*   | -3.45*         | -3.04*         | -5.83***       | -4.03**        |
|                    | PP first difference. | -2.54**  | -4.02*         | -2.36**        | -4.35**        | -3.56**        |
|                    | ADF level            | -0.66*** | -1.05***       | -0.98*         | -1.26*         | -0.83*         |
| Sri Lanka          | ADF first difference | -0.75**  | -0.64**        | -1.11**        | -2.05**        | -1.17**        |
|                    | PP level             | -0.84*** | -1.23***       | -0.54**        | -1.29**        | -0.44*         |
|                    | PP first difference. | -0.39**  | -0.95**        | -1.19**        | -2.00**        | -1.29**        |
| Sri Lanka          | ADF level            | -1.25    | -1.60*         | -1.43***       | -1.50*         | -1.66***       |
|                    | ADF first difference | -2.06*   | -2.83**        | -2.04**        | -0.67**        | -0.95**        |
|                    | PP level             | -1.28*   | -1.55**        | -1.86***       | -1.42*         | -1.74***       |
| Sri Lanka          | PP first difference. | -2.14*   | -2.40**        | -2.00**        | -0.71**        | -0.93**        |
|                    | ADF level            | -6.33*** | -4.12          | -7.18*         | -5.45***       | -6.13*         |
|                    | ADF first difference | -4.74**  | -5.38*         | -6.15**        | -3.18**        | -5.83**        |
| Sri Lanka          | PP level             | -5.90**  | -5.06*         | -6.39*         | -4.86***       | -5.48**        |
|                    | PP first difference. | -4.55**  | -4.19**        | -5.06**        | -3.44**        | -5.30**        |
|                    | ADF level            | -2.48*** | -1.70***       | -2.07***       | -1.74*         | -2.54**        |
| Sri Lanka          | ADF first difference | -3.13**  | -2.15**        | -2.94**        | -2.01**        | -2.15***       |
|                    | PP level             | -1.49*** | -1.99***       | -2.15***       | -1.85*         | -2.73**        |
|                    | PP first difference. | -3.04**  | -2.50**        | -2.80**        | -2.15**        | -2.60***       |

Y = number of people with insufficient food consumption; X<sub>1</sub> = number of confirmed COVID-19 cases; X<sub>2</sub> = balance of food trade; X<sub>3</sub> = food inflation; X<sub>4</sub> = currency exchange; \*, \*\*, \*\*\* = significance at 10% level, 5% level, and 1% level, respectively. Source: authors' development.

Table S4. ARDL short-run estimates, Group 1.

| Country                    | Parameter   | $\Delta X_1$ | $\Delta X_2$ | $\Delta X_3$ | $\Delta X_4$ | ECM       |
|----------------------------|-------------|--------------|--------------|--------------|--------------|-----------|
| Afghanistan                | Coefficient | 0.0349       | -0.1512      | 0.1270       | 0.0145       | -0.2021   |
|                            | t-stat      | 2.1275       | -3.1855      | 2.1187       | 3.7719       | -3.4062   |
|                            | Prob        | 0.0116**     | 0.0184**     | 0.5048**     | 0.4034*      | 0.0001*   |
| Burkina Faso               | Coefficient | -0.1371      | -0.4077      | 0.5284       | 0.1293       | -0.3003   |
|                            | t-stat      | 1.9773       | 2.1274       | 3.2876       | 2.8821       | -1.9920   |
|                            | Prob        | 0.0370*      | 0.0993*      | 0.1882***    | 0.0818**     | 0.0000**  |
| Chad                       | Coefficient | -0.0152      | -0.0812      | 0.1194       | -0.4443      | 0.7219    |
|                            | t-stat      | 2.4138       | 3.2296       | -2.1895      | 2.2068       | 2.1726    |
|                            | Prob        | 0.0487***    | 0.1828***    | 0.0332**     | 0.0481*      | 0.0014**  |
| Congo, Democratic Republic | Coefficient | 0.1277       | 0.0319       | 0.2910       | 0.0835       | -0.5592   |
|                            | t-stat      | 1.4005       | 5.2964       | 7.1295       | 4.8023       | -1.3443   |
|                            | Prob        | 0.0588*      | 0.1627***    | 0.0285**     | 0.0994**     | 0.0010*** |
| Ethiopia                   | Coefficient | -0.0313      | 0.0299       | 0.3063       | -0.9500      | -0.0377   |
|                            | t-stat      | -4.8291      | -2.3953      | -5.0882      | 4.2910       | -1.7738   |
|                            | Prob        | 0.0472**     | 0.1006**     | 0.0385***    | 0.1333*      | 0.0044*   |
| Guinea                     | Coefficient | 0.15721      | 0.0555       | 0.4065       | 0.0913       | -0.7954   |
|                            | t-stat      | 3.1180       | 7.0377       | 3.1196       | 1.8032       | -1.1749   |
|                            | Prob        | 0.0187**     | 0.1978***    | 0.0582***    | 0.3966***    | 0.0153*** |
| Haiti                      | Coefficient | -0.1148      | 0.2554       | 0.1491       | 0.3083       | 0.5309    |
|                            | t-stat      | 4.1599       | 3.7043       | -1.1937      | 3.2284       | 1.0526    |
|                            | Prob        | 0.1862***    | 0.4390***    | 0.3915***    | 0.0996***    | 0.0007**  |
| Mali                       | Coefficient | 0.1334       | -0.1799      | 0.4237       | -0.0885      | -0.4930   |
|                            | t-stat      | -1.1680      | 4.9382       | 2.4920       | 8.1863       | -1.1285   |
|                            | Prob        | 0.0828*      | 0.0054**     | 0.0455**     | 0.0499*      | 0.0004*   |
| Mozambique                 | Coefficient | 0.0482       | 0.2649       | 0.8003       | 0.3915       | 0.2064    |
|                            | t-stat      | 2.1154       | -2.4933      | 4.1801       | -4.2901      | 2.1192    |
|                            | Prob        | 0.0933***    | 0.0491**     | 0.3338***    | 0.0522***    | 0.0046*** |
| Nepal                      | Coefficient | -0.0338      | 0.0174       | 0.1904       | 0.0505       | -0.1883   |
|                            | t-stat      | 5.3991       | 5.3910       | -2.8302      | 6.1000       | -2.1142   |
|                            | Prob        | 0.0884***    | 0.0291***    | 0.2988**     | 0.3919**     | 0.0055**  |
| Niger                      | Coefficient | 0.1773       | -0.0506      | 0.2159       | 0.2703       | -0.2390   |
|                            | t-stat      | 2.2406       | 7.2593       | 4.3491       | -2.5099      | -2.7048   |
|                            | Prob        | 0.5321**     | 0.0488*      | 0.0039*      | 0.0487**     | 0.0030*** |
| Sierra Leone               | Coefficient | 0.0538       | 0.7401       | 0.5593       | -0.5698      | 0.5554    |
|                            | t-stat      | 4.3900       | 4.4389       | 3.2115       | 6.7302       | 1.1193    |
|                            | Prob        | 0.2291***    | 0.0883**     | 0.0599***    | 0.1776**     | 0.0019*   |
| Tajikistan                 | Coefficient | 0.1399       | 0.5450       | 0.7126       | 0.5520       | -0.1984   |
|                            | t-stat      | 6.1002       | 5.1991       | 3.4553       | 3.4098       | -2.3250   |
|                            | Prob        | 0.0058***    | 0.0046***    | 0.2964***    | 0.1865***    | 0.0009*** |
| Tanzania                   | Coefficient | 0.1391       | -0.2553      | 0.0203       | -0.4609      | -0.5072   |
|                            | t-stat      | 1.1443       | -1.1905      | -7.1392      | 6.2004       | -3.6084   |
|                            | Prob        | 0.0993**     | 0.1008*      | 0.0355*      | 0.0830*      | 0.0014**  |
| Yemen                      | Coefficient | -0.0309      | 0.6921       | 0.6665       | 0.0195       | -0.1988   |
|                            | t-stat      | -2.1866      | 3.2077       | 2.5043       | -5.1006      | -2.5829   |
|                            | Prob        | 0.0554*      | 0.0973***    | 0.1115***    | 0.1863***    | 0.0110*** |

$X_1$  = number of confirmed COVID-19 cases;  $X_2$  = balance of food trade;  $X_3$  = food inflation;  $X_4$  = currency exchange; \*, \*\*, \*\*\* = significance at 10% level, 5% level, and 1% level, respectively. Source: authors' development.

Table S5. ARDL short-run estimates, Group 2.

| Country       | Parameter   | $\Delta X_1$ | $\Delta X_2$ | $\Delta X_3$ | $\Delta X_4$ | ECM       |
|---------------|-------------|--------------|--------------|--------------|--------------|-----------|
| Bangladesh    | Coefficient | 0.3599       | 0.0582       | 0.1103       | 0.0861       | 0.1472    |
|               | t-stat      | -3.8921      | -1.8298      | 3.2918       | 1.0284       | 1.5590    |
|               | Prob        | 0.0482**     | 0.1985***    | 0.0943***    | 0.0071***    | 0.0487**  |
| Bolivia       | Coefficient | 0.5018       | 0.0345       | 0.0337       | 0.0046       | 0.1876    |
|               | t-stat      | 7.1924       | -2.8882      | 4.4041       | 2.2965       | 3.1209    |
|               | Prob        | 0.0386*      | 0.0496***    | 0.0182***    | 0.1283***    | 0.0938*** |
| Cambodia      | Coefficient | -0.0664      | -0.5001      | -0.4771      | -0.0966      | -0.4527   |
|               | t-stat      | -3.3836      | 5.7830       | 3.6019       | 1.4498       | -1.8403   |
|               | Prob        | 0.0485***    | 0.2785**     | 0.3918*      | 0.0835***    | 0.0829**  |
| Cameroon      | Coefficient | 0.1190       | 0.1834       | 0.1493       | 0.0491       | 0.3875    |
|               | t-stat      | 5.3903       | -3.3439      | -1.4811      | 1.0073       | 3.4912    |
|               | Prob        | 0.1388***    | 0.0594**     | 0.0083**     | 0.0689***    | 0.0015*** |
| Cote d'Ivoire | Coefficient | 0.0690       | 0.0841       | 0.3550       | 0.2094       | -0.3187   |
|               | t-stat      | 2.2702       | 4.9964       | 2.4387       | -4.3309      | -3.1030   |
|               | Prob        | 0.0559***    | 0.1285***    | 0.0472***    | 0.5018**     | 0.0593**  |
| India         | Coefficient | 0.5320       | 0.3401       | -0.0400      | 0.3343       | -0.2981   |
|               | t-stat      | 7.5182       | 6.0003       | -6.0909      | -3.1286      | -3.0844   |
|               | Prob        | 0.0491***    | 0.0991***    | 0.0424***    | 0.0488**     | 0.0011*** |
| Indonesia     | Coefficient | 0.3476       | 0.2918       | -0.0309      | 0.5862       | 0.4299    |
|               | t-stat      | 3.2777       | 5.4391       | -3.9285      | -3.1174      | 1.9392    |
|               | Prob        | 0.0593**     | 0.1922***    | 0.1800***    | 0.0015**     | 0.0006*   |
| Kenya         | Coefficient | 0.2375       | 0.4291       | 0.2959       | 0.4006       | 0.3918    |
|               | t-stat      | -2.0086      | -2.1314      | 4.2072       | 2.2099       | 2.1773    |
|               | Prob        | 0.0059*      | 0.0345***    | 0.1288**     | 0.2916***    | 0.0110**  |
| Kyrgyzstan    | Coefficient | 0.0505       | 0.1096       | 0.3829       | 0.3096       | -0.1559   |
|               | t-stat      | -4.4134      | 2.0055       | 6.4012       | 3.5482       | -2.0672   |
|               | Prob        | 0.1729***    | 0.3921**     | 0.3023***    | 0.0926**     | 0.0018*** |
| Nigeria       | Coefficient | 0.1006       | 0.1128       | 0.4472       | 0.4814       | 0.2850    |
|               | t-stat      | 5.0399       | -1.5039      | 1.5286       | 6.4088       | 3.1195    |
|               | Prob        | 0.0098**     | 0.5920**     | 0.0053***    | 0.1892*      | 0.0055**  |
| Pakistan      | Coefficient | 0.5593       | 0.2918       | -0.4925      | 0.8863       | 0.2917    |
|               | t-stat      | 2.0546       | 2.5503       | 4.0938       | 6.0582       | 3.2001    |
|               | Prob        | 0.0059***    | 0.0920***    | 0.4553**     | 0.0076*      | 0.0085*** |
| Philippines   | Coefficient | 0.8265       | 0.4439       | 0.1097       | 0.1294       | -0.2983   |
|               | t-stat      | 1.4924       | -1.0965      | 1.2876       | 2.4006       | -2.0945   |
|               | Prob        | 0.0827*      | 0.0592**     | 0.4485*      | 0.3193**     | 0.0096**  |
| Tunisia       | Coefficient | 0.1285       | 0.3900       | 0.2157       | 0.1884       | 0.4285    |
|               | t-stat      | -2.7038      | 1.3886       | 2.7729       | 2.1009       | 2.1006    |
|               | Prob        | 0.0487**     | 0.0093**     | 0.0900**     | 0.4981***    | 0.0007*   |
| Vietnam       | Coefficient | -0.3909      | 0.0184       | 0.3051       | 0.2286       | -0.0783   |
|               | t-stat      | 3.7544       | 3.8916       | -2.0044      | 1.5390       | -1.9504   |
|               | Prob        | 0.0593***    | 0.0996***    | 0.0093**     | 0.0135**     | 0.0167**  |
| Zambia        | Coefficient | -0.0138      | 0.5197       | 0.6290       | -0.4499      | 0.3901    |
|               | t-stat      | 1.2884       | 4.0091       | 2.6664       | -6.2030      | 1.8026    |
|               | Prob        | 0.0927***    | 0.1952*      | 0.0844**     | 0.0086*      | 0.0095**  |

$X_1$  = number of confirmed COVID-19 cases;  $X_2$  = balance of food trade;  $X_3$  = food inflation;  $X_4$  = currency exchange; \*, \*\*, \*\*\* = significance at 10% level, 5% level, and 1% level, respectively. Source: authors' development.

Table S6. ARDL short-run estimates, Group 3.

| Country            | Parameter   | $\Delta X_1$ | $\Delta X_2$ | $\Delta X_3$ | $\Delta X_4$ | ECM       |
|--------------------|-------------|--------------|--------------|--------------|--------------|-----------|
| Algeria            | Coefficient | 0.0559       | 0.6302       | -0.7728      | 0.1954       | -0.3309   |
|                    | t-stat      | 2.5443       | 1.1095       | -1.2887      | -1.2099      | -1.2875   |
|                    | Prob        | 0.0421*      | 0.0598**     | 0.0042*      | 0.0586**     | 0.0048*** |
| Botswana           | Coefficient | -0.4097      | 0.4154       | 0.0499       | 0.0071       | 0.3977    |
|                    | t-stat      | 3.0854       | -1.0773      | 2.0947       | -1.8382      | 3.2114    |
|                    | Prob        | 0.0095*      | 0.0883***    | 0.0994**     | 0.2186**     | 0.0093**  |
| Colombia           | Coefficient | 0.0392       | 0.4928       | 0.1630       | 0.0449       | 0.1074    |
|                    | t-stat      | 2.4981       | 2.0392       | 3.1114       | 2.4985       | 2.3029    |
|                    | Prob        | 0.0056***    | 0.0185***    | 0.0486**     | 0.1987***    | 0.0027*** |
| Dominican Republic | Coefficient | 0.0882       | 0.3096       | -0.1719      | 0.1285       | -0.3028   |
|                    | t-stat      | 2.4895       | 3.1175       | 2.1332       | 2.8850       | -3.3926   |
|                    | Prob        | 0.0977***    | 0.1194***    | 0.0090***    | 0.0187***    | 0.0029**  |
| Ecuador            | Coefficient | 0.4022       | 0.1135       | 0.2389       | 0.5096       | 0.1975    |
|                    | t-stat      | 7.0974       | 6.2038       | -2.5550      | -2.3918      | 1.8443    |
|                    | Prob        | 0.0885***    | 0.2876**     | 0.0049***    | 0.0111**     | 0.0138*   |
| Guatemala          | Coefficient | 0.1791       | 0.1990       | -0.3388      | 0.1120       | 0.4983    |
|                    | t-stat      | 4.7367       | 4.3009       | -1.8727      | 3.2378       | 2.0987    |
|                    | Prob        | 0.0059**     | 0.0177**     | 0.1284*      | 0.0295*      | 0.0364**  |
| Iran               | Coefficient | -0.0509      | -0.1845      | -0.4003      | -0.0862      | 0.2678    |
|                    | t-stat      | 2.1986       | 1.2209       | -5.1767      | 2.8475       | 3.2784    |
|                    | Prob        | 0.0975*      | 0.1878*      | 0.0340**     | 0.2901*      | 0.0502**  |
| Iraq               | Coefficient | 0.0482       | 0.1190       | -0.9498      | 0.1376       | -0.4985   |
|                    | t-stat      | -3.8863      | 2.0493       | -2.1447      | 1.8309       | -1.3873   |
|                    | Prob        | 0.0985**     | 0.0053**     | 0.1985*      | 0.0043**     | 0.0387**  |
| Jordan             | Coefficient | -0.1185      | 0.7392       | 0.0399       | 0.4008       | -0.2254   |
|                    | t-stat      | 3.5007       | 3.8299       | 3.0404       | -5.1223      | -2.0980   |
|                    | Prob        | 0.0444*      | 0.0083***    | 0.0028**     | 0.1174***    | 0.0127*** |
| Lebanon            | Coefficient | 0.1761       | 0.5042       | 0.4094       | 0.2886       | -0.3104   |
|                    | t-stat      | 2.4332       | 4.0939       | 4.0125       | -3.7748      | -4.0638   |
|                    | Prob        | 0.0054**     | 0.0118***    | 0.0137**     | 0.2864***    | 0.0019**  |
| Libya              | Coefficient | -0.2006      | 0.3440       | 0.1876       | 0.1555       | 0.1986    |
|                    | t-stat      | 7.0287       | -3.2264      | 3.9275       | 2.2890       | 3.1183    |
|                    | Prob        | 0.0195**     | 0.0870***    | 0.0089***    | 0.0482***    | 0.0054*   |
| Namibia            | Coefficient | -0.5016      | 0.2928       | 0.1231       | 0.3968       | -0.2359   |
|                    | t-stat      | -2.4729      | 3.4433       | -1.3918      | 2.5520       | -1.2263   |
|                    | Prob        | 0.0192*      | 0.0042***    | 0.0303**     | 0.2666***    | 0.0149**  |
| Peru               | Coefficient | 0.5441       | 0.2856       | 0.0036       | 0.0465       | 0.0585    |
|                    | t-stat      | 3.0665       | 5.3771       | 2.1098       | -2.7743      | 1.1972    |
|                    | Prob        | 0.0490***    | 0.2885**     | 0.1974*      | 0.0283*      | 0.0013*** |
| Sri Lanka          | Coefficient | 0.3352       | -0.2549      | 0.5043       | -0.1665      | 0.0064    |
|                    | t-stat      | -1.7776      | 1.3981       | 3.0932       | 6.0554       | 3.0336    |
|                    | Prob        | 0.0554**     | 0.0043*      | 0.0012*      | 0.0590**     | 0.0222**  |
| Turkey             | Coefficient | 0.0743       | 0.0909       | 0.3553       | 0.0170       | -0.3984   |
|                    | t-stat      | 4.1739       | 3.2030       | -2.1126      | -2.0337      | -3.8711   |
|                    | Prob        | 0.0146*      | 0.0487*      | 0.0388**     | 0.0445***    | 0.0550*** |

$X_1$  = number of confirmed COVID-19 cases;  $X_2$  = balance of food trade;  $X_3$  = food inflation;  $X_4$  = currency exchange; \*, \*\*, \*\*\* = significance at 10% level, 5% level, and 1% level, respectively. Source: authors' development.

Table S7. FMOLS and DOLS tests results and ARDL long-run estimates, Group 1.

| Country                    | Parameters        | X <sub>1</sub> | X <sub>2</sub> | X <sub>3</sub> | X <sub>4</sub> | Constant |
|----------------------------|-------------------|----------------|----------------|----------------|----------------|----------|
| Afghanistan                | ARDL coefficient  | 0.0285         | -0.1729        | 0.1284         | 0.0183         | -4.8699  |
|                            | ARDL t-stat       | 3.1829**       | -4.1294**      | 3.9012**       | 4.2019*        | -2.1845  |
|                            | FMOLS coefficient | 0.0318         | -0.1782        | 0.2015         | 0.1836         | -3.5097  |
|                            | FMOLS t-stat      | 2.9102**       | -4.8472**      | 2.4964*        | 3.2087*        | -2.0836  |
|                            | DOLS coefficient  | 0.0279         | -0.1543        | 0.1711         | 0.1104         | -4.5192  |
| Burkina Faso               | DOLS t-stat       | 3.1991**       | -4.0564**      | 3.8042**       | 4.2192*        | -2.1739  |
|                            | ARDL coefficient  | -0.1128        | -0.3981        | 0.5192         | 0.1038         | -5.1938  |
|                            | ARDL t-stat       | 1.9942*        | 2.0994*        | 4.0006***      | 1.1022**       | -1.5002  |
|                            | FMOLS coefficient | -0.1764        | -0.3927        | 0.5928         | 0.1602         | -3.9772  |
|                            | FMOLS t-stat      | 1.8974**       | 2.2297*        | 2.5934**       | 1.4997**       | -2.9598  |
| Chad                       | DOLS coefficient  | -0.1319        | -0.5051        | 0.6189         | 0.1591         | -4.1683  |
|                            | DOLS t-stat       | 2.1975*        | 2.1925*        | 2.1985**       | 1.1865**       | -1.6187  |
|                            | ARDL coefficient  | -0.0185        | -0.0943        | 0.1067         | -0.4902        | 1.6920   |
|                            | ARDL t-stat       | 2.4019***      | 3.1762***      | -3.9058**      | 3.1987*        | 2.6825   |
|                            | FMOLS coefficient | -0.1208        | -0.3111        | 0.1529         | -0.3988        | 1.9882   |
| Congo, Democratic Republic | FMOLS t-stat      | 1.5997***      | 1.9772**       | -3.5920**      | 3.0063*        | 3.1592   |
|                            | DOLS coefficient  | -0.1182        | -0.2875        | 0.1288         | -0.4902        | 1.7647   |
|                            | DOLS t-stat       | 2.5817***      | 2.1953**       | -3.9291**      | 3.1987*        | 2.7291   |
|                            | ARDL coefficient  | 0.1099         | 0.0211         | 0.1392         | 0.0812         | -4.4892  |
|                            | ARDL t-stat       | 1.3902*        | 5.3677***      | 7.0218**       | 4.7391**       | -1.3827  |
| Ethiopia                   | FMOLS coefficient | 0.1197         | 0.1298         | 0.2919         | 0.1397         | -2.6999  |
|                            | FMOLS t-stat      | 1.8472*        | 4.9287**       | 6.0984**       | 4.6920**       | -2.4773  |
|                            | DOLS coefficient  | 0.1099         | 0.0371         | 0.1997         | 0.1138         | -4.0053  |
|                            | DOLS t-stat       | 1.3904*        | 5.4873***      | 7.2815**       | 4.5272**       | -1.0957  |
|                            | ARDL coefficient  | -0.0281        | 0.0172         | 0.2385         | -0.8491        | -5.0092  |
| Guinea                     | ARDL t-stat       | -5.1220**      | -3.1492**      | -6.9258***     | 5.1299*        | -2.6935  |
|                            | FMOLS coefficient | -0.0492        | 0.0776         | 0.3058         | -0.7991        | -5.9711  |
|                            | FMOLS t-stat      | -2.5908***     | -3.0988**      | -4.8989***     | 5.0029*        | -2.9876  |
|                            | DOLS coefficient  | -0.0328        | 0.0187         | 0.2865         | -0.8290        | -5.0984  |
|                            | DOLS t-stat       | -4.993**       | -3.8772**      | -5.2988***     | 5.4832*        | -2.0388  |
| Haiti                      | ARDL coefficient  | 0.1741         | 0.0482         | 0.3212         | 0.0817         | -4.8888  |
|                            | ARDL t-stat       | 3.0054**       | 7.0011***      | 4.1029***      | 1.7629***      | -1.1457  |
|                            | FMOLS coefficient | 0.1755         | 0.0692         | 0.4927         | 0.1690         | -4.9921  |
|                            | FMOLS t-stat      | 2.9832**       | 4.0982***      | 3.9952**       | 2.8892**       | -1.2780  |
|                            | DOLS coefficient  | 0.1835         | 0.0467         | 0.5197         | 0.1518         | -4.8726  |
| Mali                       | DOLS t-stat       | 2.5672**       | 5.1382***      | 4.1593**       | 2.3082**       | -1.1550  |
|                            | ARDL coefficient  | -0.0995        | 0.2918         | 0.1392         | 0.4987         | 2.5683   |
|                            | ARDL t-stat       | 4.1972***      | 3.9019***      | -1.0289***     | 3.1987***      | 1.0046   |
|                            | FMOLS coefficient | -0.1297        | 0.2887         | 0.1289         | 0.5198         | 2.5298   |
|                            | FMOLS t-stat      | 3.9077***      | 3.0983**       | -1.5928***     | 2.5929**       | 2.1395   |
| Mozambique                 | DOLS coefficient  | -0.1198        | 0.2278         | 0.1418         | 0.5029         | 2.6589   |
|                            | DOLS t-stat       | 4.2901***      | 2.1995**       | -1.3787***     | 2.8859**       | 2.0853   |
|                            | ARDL coefficient  | 0.1117         | -0.1284        | 0.4020         | -0.0928        | -3.5833  |
|                            | ARDL t-stat       | -1.1213*       | 5.2812**       | 3.1718**       | 9.2918*        | -1.0425  |
|                            | FMOLS coefficient | 0.1290         | -0.1897        | 0.5902         | -0.1887        | -2.0873  |
| Nepal                      | FMOLS t-stat      | -1.3887*       | 3.9084**       | 3.9895*        | 6.8983*        | -1.0822  |
|                            | DOLS coefficient  | 0.1489         | -0.1392        | 0.4108         | -0.1798        | -3.5787  |
|                            | DOLS t-stat       | -1.1519*       | 4.2294**       | 2.9874**       | 8.3982*        | -1.1182  |
|                            | ARDL coefficient  | 0.0014         | 0.2018         | 0.8624         | 0.3890         | 4.1492   |
|                            | ARDL t-stat       | 2.0475***      | -2.4094**      | 5.1902***      | -5.111***      | 2.0948   |
| Niger                      | FMOLS coefficient | 0.1192         | 0.1189         | 0.6652         | 0.3882         | 2.0985   |
|                            | FMOLS t-stat      | 3.2877**       | 2.0935***      | 4.9887***      | -3.9872***     | 1.5983   |
|                            | DOLS coefficient  | 0.0298         | 0.0982         | 0.8787         | 0.3386         | 3.1589   |
|                            | DOLS t-stat       | 3.7795**       | 3.5972***      | 5.5983***      | -4.6903***     | 2.4123   |
|                            | ARDL coefficient  | -0.0281        | 0.0041         | 0.1825         | 0.0488         | -5.1947  |
| Niger                      | ARDL t-stat       | 6.3018***      | 4.1975***      | -2.8977**      | 6.1998**       | -2.3595  |
|                            | FMOLS coefficient | -0.1490        | 0.0275         | 0.1826         | 0.0712         | -5.0002  |
|                            | FMOLS t-stat      | 2.9955**       | 4.0002**       | -2.6981**      | 5.9921**       | -2.5099  |
|                            | DOLS coefficient  | -0.1302        | 0.0487         | 0.1792         | 0.0771         | -5.3028  |
|                            | DOLS t-stat       | 3.5083**       | 3.8975**       | -2.6778**      | 5.2915**       | -2.4412  |
| Niger                      | ARDL coefficient  | 0.1662         | -0.0382        | 0.2017         | 0.2900         | -6.2945  |
|                            | ARDL t-stat       | 2.2209**       | 8.1924*        | 5.2975*        | -2.5002**      | -3.6800  |
|                            | FMOLS coefficient | 0.1682         | -0.2184        | 0.2804         | 0.3398         | -5.1284  |

|              |                   |           |           |           |            |         |
|--------------|-------------------|-----------|-----------|-----------|------------|---------|
|              | FMOLS t-stat      | 1.9925**  | 2.0582**  | 4.8824*   | -2.9882**  | -3.1898 |
|              | DOLS coefficient  | 0.1730    | -0.1985   | 0.2918    | 0.2918     | -5.7287 |
|              | DOLS t-stat       | 2.3780**  | 2.5987**  | 5.0006*   | -2.8924**  | -3.8824 |
| Sierra Leone | ARDL coefficient  | 0.0948    | 0.6281    | 0.6927    | -0.5902    | 2.5038  |
|              | ARDL t-stat       | 5.3810*** | 5.5278**  | 4.2019*** | 6.8763**   | 1.0002  |
|              | FMOLS coefficient | 0.1822    | 0.5122    | 0.4894    | -0.3982    | 2.0032  |
|              | FMOLS t-stat      | 4.1989**  | 4.0828**  | 3.5019**  | 5.0285**   | 1.6729  |
|              | DOLS coefficient  | 0.1759    | 0.6991    | 0.5284    | -0.4828    | 1.9943  |
|              | DOLS t-stat       | 3.9981**  | 5.0376**  | 3.0107**  | 5.2787**   | 1.8811  |
| Tajikistan   | ARDL coefficient  | 0.1114    | 0.5393    | 0.7029    | 0.6592     | -3.0592 |
|              | ARDL t-stat       | 8.1988*** | 5.1782*** | 3.1314*** | 3.4918***  | -2.3098 |
|              | FMOLS coefficient | 0.1421    | 0.4019    | 0.5872    | 0.5628     | -2.5882 |
|              | FMOLS t-stat      | 6.0982*** | 3.0066*** | 3.0881*** | 2.7299**   | -2.0021 |
|              | DOLS coefficient  | 0.1298    | 0.4280    | 0.6938    | 0.5039     | -2.7938 |
|              | DOLS t-stat       | 7.2875*** | 4.8982*** | 3.1528*** | 2.5982**   | -1.9992 |
| Tanzania     | ARDL coefficient  | 0.1286    | -0.2919   | 0.0176    | -0.4718    | -5.4957 |
|              | ARDL t-stat       | 1.1904**  | -1.1830*  | -8.2918*  | 9.1987*    | -3.5956 |
|              | FMOLS coefficient | 0.1392    | -0.4113   | 0.0518    | -0.6024    | -4.0997 |
|              | FMOLS t-stat      | 1.3020**  | -1.2996*  | -6.4202*  | 6.8993*    | -3.9980 |
|              | DOLS coefficient  | 0.1389    | -0.3092   | 0.0188    | -0.5982    | -4.9821 |
|              | DOLS t-stat       | 1.2994**  | -1.1682*  | -6.8821*  | 7.1110*    | -3.3336 |
| Yemen        | ARDL coefficient  | -0.0212   | 0.7720    | 0.8021    | 0.0028     | -4.2095 |
|              | ARDL t-stat       | -3.4881*  | 3.9901*** | 2.9413*** | -6.1862*** | -2.6083 |
|              | FMOLS coefficient | -0.0441   | 0.6600    | 0.7402    | 0.0202     | -4.0024 |
|              | FMOLS t-stat      | -3.0022*  | 4.2019**  | 3.3193*** | -5.0013*** | -3.1497 |
|              | DOLS coefficient  | -0.0384   | 0.7351    | 0.7744    | 0.0198     | -4.2392 |
|              | DOLS t-stat       | -3.6920*  | 4.5992**  | 3.5928*** | -5.7724*** | -3.5590 |

$X_1$  = number of confirmed COVID-19 cases;  $X_2$  = balance of food trade;  $X_3$  = food inflation;  $X_4$  = currency exchange; \*, \*\*, \*\*\* = significance at 10% level, 5% level, and 1% level, respectively. Source: authors' development.



Table S8. FMOLS and DOLS tests results and ARDL long-run estimates, Group 2.

| Country       | Parameters        | X <sub>1</sub> | X <sub>2</sub> | X <sub>3</sub> | X <sub>4</sub> | Constant |
|---------------|-------------------|----------------|----------------|----------------|----------------|----------|
| Bangladesh    | ARDL coefficient  | 0.3828         | 0.0482         | 0.0993         | 0.0156         | 2.4735   |
|               | ARDL t-stat       | -3.8200**      | -1.3928***     | 3.6928***      | 1.0054***      | 1.6732   |
|               | FMOLS coefficient | 0.4001         | 0.1993         | 0.1309         | 0.0397         | 2.3392   |
|               | FMOLS t-stat      | -2.0904**      | -1.0035**      | 2.0686***      | 1.5904**       | 1.8883   |
|               | DOLS coefficient  | 0.3590         | 0.0598         | 0.1192         | 0.0200         | 2.5991   |
| Bolivia       | DOLS t-stat       | -3.4983**      | -1.3522***     | 3.2094***      | 1.0402***      | 1.6529   |
|               | ARDL coefficient  | 0.4913         | 0.0201         | 0.0294         | 0.0182         | 4.8209   |
|               | ARDL t-stat       | 9.2066*        | -2.9483***     | 4.2877***      | 2.1985***      | 3.2555   |
|               | FMOLS coefficient | 0.5921         | 0.0628         | 0.0582         | 0.0778         | 3.5026   |
|               | FMOLS t-stat      | 7.9093**       | -2.9940**      | 3.9002***      | 1.8294***      | 3.0053   |
| Cambodia      | DOLS coefficient  | 0.5199         | 0.0494         | 0.0400         | 0.0699         | 3.7844   |
|               | DOLS t-stat       | 8.3192*        | -2.6850***     | 3.4995***      | 1.7877***      | 3.1920   |
|               | ARDL coefficient  | -0.0583        | -0.4877        | -0.4899        | -0.0831        | -2.4671  |
|               | ARDL t-stat       | -4.3921***     | 5.7092**       | 3.6948*        | 1.5937***      | -1.9932  |
|               | FMOLS coefficient | -0.0992        | -0.6043        | -0.7277        | -0.0891        | -2.0694  |
| Cameroon      | FMOLS t-stat      | -2.0055**      | 5.1984**       | 2.5593**       | 1.9924***      | -1.9902  |
|               | DOLS coefficient  | -0.0691        | -0.5920        | -0.5921        | -0.0782        | -2.5584  |
|               | DOLS t-stat       | -3.7882***     | 4.8923**       | 3.5566*        | 1.7085***      | -2.0043  |
|               | ARDL coefficient  | 0.0372         | 0.1752         | 0.0948         | 0.0927         | 6.2987   |
|               | ARDL t-stat       | 5.3928***      | -4.3991**      | -1.2583**      | 1.5274***      | 4.2076   |
| Cote d'Ivoire | FMOLS coefficient | 0.1193         | 0.2190         | 0.1094         | 0.1006         | 5.0909   |
|               | FMOLS t-stat      | 3.0026**       | -3.0924**      | -1.2283**      | 1.4928***      | 3.8892   |
|               | DOLS coefficient  | 0.0829         | 0.1956         | 0.0952         | 0.0994         | 5.8890   |
|               | DOLS t-stat       | 4.6728***      | -4.0482**      | -1.1196**      | 1.5671***      | 4.9977   |
|               | ARDL coefficient  | 0.0483         | 0.0728         | 0.3295         | 0.1928         | -5.2696  |
| India         | ARDL t-stat       | 4.2916***      | 5.2985***      | 2.1957***      | -6.2918**      | -4.1182  |
|               | FMOLS coefficient | 0.0890         | 0.0983         | 0.4287         | 0.1906         | -5.0434  |
|               | FMOLS t-stat      | 4.0915***      | 4.9289***      | 2.2286***      | 5.8921**       | -4.8985  |
|               | DOLS coefficient  | 0.0666         | 0.0834         | 0.3488         | 0.1899         | -5.5529  |
|               | DOLS t-stat       | 4.8921***      | 4.8743***      | 2.1684***      | -6.1400**      | -4.1592  |
| Indonesia     | ARDL coefficient  | 0.4820         | 0.3863         | -0.0823        | 0.2986         | -5.1903  |
|               | ARDL t-stat       | 9.2914***      | 7.2917***      | -9.4182***     | -4.2975**      | -4.0002  |
|               | FMOLS coefficient | 0.4029         | 0.3892         | -0.0787        | 0.3281         | -4.9889  |
|               | FMOLS t-stat      | 8.2014***      | 6.5982***      | -8.4985***     | -4.9990**      | -4.5024  |
|               | DOLS coefficient  | 0.4584         | 0.3771         | -0.0988        | 0.3044         | -5.2993  |
| Kenya         | DOLS t-stat       | 8.0778***      | 6.3335***      | -8.6683***     | -4.5838**      | -4.8195  |
|               | ARDL coefficient  | 0.2285         | 0.2227         | -0.0721        | 0.5724         | 2.1790   |
|               | ARDL t-stat       | 4.2985**       | 4.5928***      | -4.9289***     | -3.2983**      | 1.9624   |
|               | FMOLS coefficient | 0.3054         | 0.2309         | -0.0672        | 0.5548         | 2.3881   |
|               | FMOLS t-stat      | 4.5220**       | 4.6083***      | -4.6718***     | -2.9896**      | 1.9999   |
| Kyrgyzstan    | DOLS coefficient  | 0.2386         | 0.2254         | -0.0680        | 0.5655         | 2.1666   |
|               | DOLS t-stat       | 4.0631**       | 4.5992***      | -4.8843***     | -3.0633**      | 1.8078   |
|               | ARDL coefficient  | 0.2010         | 0.4999         | 0.2784         | 0.4443         | 3.2755   |
|               | ARDL t-stat       | -3.5917*       | -3.0288***     | 5.2903**       | 2.1985***      | 3.0585   |
|               | FMOLS coefficient | 0.2286         | 0.4492         | 0.3392         | 0.5027         | 3.3386   |
| Nigeria       | FMOLS t-stat      | -2.9018*       | -1.6987***     | 4.6029**       | 1.7692***      | 3.1295   |
|               | DOLS coefficient  | 0.2133         | 0.4973         | 0.2598         | 0.4559         | 3.2853   |
|               | DOLS t-stat       | -3.6005*       | -2.0682***     | 4.5902**       | 1.8843***      | 3.1000   |
|               | ARDL coefficient  | 0.0392         | 0.1562         | 0.6999         | 0.3892         | -4.1446  |
|               | ARDL t-stat       | -5.3992***     | 3.1778**       | 7.2808***      | 3.3816**       | -3.9836  |
| Pakistan      | FMOLS coefficient | 0.0596         | 0.1567         | 0.7185         | 0.4399         | -4.3921  |
|               | FMOLS t-stat      | -4.9928***     | 2.9830**       | 6.4929***      | 3.5938**       | -3.5598  |
|               | DOLS coefficient  | 0.0449         | 0.1481         | 0.7083         | 0.3597         | -4.2850  |
|               | DOLS t-stat       | -5.0734***     | 3.0053**       | 6.8796***      | 3.9732**       | -3.7043  |
|               | ARDL coefficient  | 0.1279         | 0.1038         | 0.5026         | 0.7725         | 6.1993   |
| Kenya         | ARDL t-stat       | 6.2917**       | -2.4820**      | 2.9184***      | 8.3974*        | 4.0975   |
|               | FMOLS coefficient | 0.1592         | 0.1384         | 0.5595         | 0.7594         | 5.9987   |
|               | FMOLS t-stat      | 5.8921**       | -2.7891**      | 2.8493***      | 7.9029*        | 4.1296   |
|               | DOLS coefficient  | 0.1357         | 0.1198         | 0.5102         | 0.7628         | 6.0042   |
|               | DOLS t-stat       | 6.1183**       | -2.4037**      | 2.9575***      | 8.3290*        | 4.1119   |
| Pakistan      | ARDL coefficient  | 0.5826         | 0.3827         | -0.3712        | 0.9428         | 5.1987   |
|               | ARDL t-stat       | 3.5938***      | 3.6826***      | 5.2877**       | 7.2973*        | 4.1907   |
|               | FMOLS coefficient | 0.5492         | 0.4024         | -0.4582        | 0.7693         | 4.7288   |

|             |                   |           |           |           |           |         |
|-------------|-------------------|-----------|-----------|-----------|-----------|---------|
|             | FMOLS t-stat      | 3.0597*** | 3.6792*** | 3.0900**  | 6.8298*   | 4.5929  |
|             | DOLS coefficient  | 0.5599    | 0.3825    | -0.3540   | 0.9020    | 5.0005  |
|             | DOLS t-stat       | 3.6687*** | 3.6822*** | 5.4991**  | 7.0664*   | 4.2984  |
| Philippines | ARDL coefficient  | 0.9858    | 0.4828    | 0.1123    | 0.1147    | -7.3875 |
|             | ARDL t-stat       | 1.5932*   | -1.3922** | 1.5662*   | 2.4826**  | -3.4877 |
|             | FMOLS coefficient | 0.9029    | 0.4723    | 0.1320    | 0.1418    | -7.0983 |
|             | FMOLS t-stat      | 1.6992*   | -1.9095** | 1.9247*   | 2.3019**  | -3.0664 |
|             | DOLS coefficient  | 0.9576    | 0.4774    | 0.1219    | 0.1295    | -7.4929 |
|             | DOLS t-stat       | 1.5983*   | -1.3791** | 1.5780*   | 2.4595**  | -3.4917 |
| Tunisia     | ARDL coefficient  | 0.0424    | 0.9382    | 0.2058    | 0.1785    | 3.4906  |
|             | ARDL t-stat       | -3.9586** | 2.4928**  | 2.9846**  | 3.2977*** | 3.0957  |
|             | FMOLS coefficient | 0.0673    | 0.9522    | 0.2391    | 0.1892    | 3.9825  |
|             | FMOLS t-stat      | -3.0010** | 2.7907**  | 2.8299**  | 3.0090*** | 3.5050  |
|             | DOLS coefficient  | 0.0552    | 0.9380    | 0.2055    | 0.1761    | 3.4789  |
|             | DOLS t-stat       | -3.5829** | 2.4926**  | 2.9847**  | 3.2960*** | 3.0888  |
| Vietnam     | ARDL coefficient  | -0.2975   | 0.0192    | 0.3916    | 0.2988    | -5.0700 |
|             | ARDL t-stat       | 4.7003*** | 4.4987*** | -2.3815** | 1.5927**  | -1.9875 |
|             | FMOLS coefficient | -0.4028   | 0.0478    | 0.5919    | 0.3288    | -5.0082 |
|             | FMOLS t-stat      | 3.0981**  | 3.0996*** | -2.3985** | 1.7720**  | 1.8445  |
|             | DOLS coefficient  | -0.3045   | 0.0156    | 0.4176    | 0.3019    | -5.1998 |
|             | DOLS t-stat       | 4.7114*** | 4.4942*** | -2.3993** | 1.6728**  | -1.7193 |
| Zambia      | ARDL coefficient  | -0.0052   | 0.5020    | 0.7122    | -0.4826   | 3.9608  |
|             | ARDL t-stat       | 1.5698*** | 5.2984*   | 3.6836**  | -7.2815*  | 2.9996  |
|             | FMOLS coefficient | -0.0568   | 0.5992    | 0.6988    | -0.5074   | 3.7902  |
|             | FMOLS t-stat      | 2.9996**  | 4.9900*   | 3.6093**  | -5.9827*  | 2.9696  |
|             | DOLS coefficient  | -0.0045   | 0.5446    | 0.7309    | -0.4988   | 3.9802  |
|             | DOLS t-stat       | 1.5788*** | 5.3929*   | 3.8934**  | -6.4999*  | 2.9007  |

$X_1$  = number of confirmed COVID-19 cases;  $X_2$  = balance of food trade;  $X_3$  = food inflation;  $X_4$  = currency exchange; \*, \*\*, \*\*\* = significance at 10% level, 5% level, and 1% level, respectively. Source: authors' development.

Table S9. FMOLS and DOLS tests results and ARDL long-run estimates, Group 3.

| Country            | Parameters        | X <sub>1</sub> | X <sub>2</sub> | X <sub>3</sub> | X <sub>4</sub> | Constant |
|--------------------|-------------------|----------------|----------------|----------------|----------------|----------|
| Algeria            | ARDL coefficient  | 0.0486         | 0.7294         | -0.9621        | 0.1833         | -2.4985  |
|                    | ARDL t-stat       | 2.6893*        | 1.0487**       | -1.2947*       | -1.3028**      | -2.0012  |
|                    | FMOLS coefficient | 0.0688         | 0.7045         | -0.9404        | 0.2291         | -2.4056  |
|                    | FMOLS t-stat      | 2.4982*        | 1.2928**       | -1.3300*       | -1.3098**      | -2.0667  |
|                    | DOLS coefficient  | 0.0506         | 0.7377         | -0.9501        | 0.1952         | -2.5029  |
|                    | DOLS t-stat       | 2.6944*        | 1.0483**       | -1.2892*       | -1.3111**      | -2.0482  |
| Botswana           | ARDL coefficient  | -0.3985        | 0.4937         | 0.0385         | 0.3792         | 6.2875   |
|                    | ARDL t-stat       | 4.2970*        | -1.9473***     | 2.6973**       | -1.9582**      | 4.2099   |
|                    | FMOLS coefficient | -0.4892        | 0.5044         | 0.0928         | 0.4081         | 6.1103   |
|                    | FMOLS t-stat      | 4.3929*        | -1.8029***     | 2.5504**       | -1.9772**      | 4.2468   |
|                    | DOLS coefficient  | -0.4078        | 0.4985         | 0.0682         | 0.3694         | 6.2901   |
|                    | DOLS t-stat       | 4.2444*        | -1.9471***     | 2.7010**       | -1.9773**      | 4.2399   |
| Colombia           | ARDL coefficient  | 0.0284         | 0.3309         | 0.1566         | 0.0462         | 4.1984   |
|                    | ARDL t-stat       | 2.5897***      | 2.5824***      | 3.0521**       | 2.3975***      | 3.0019   |
|                    | FMOLS coefficient | 0.0344         | 0.4090         | 0.1390         | 0.0628         | 4.1197   |
|                    | FMOLS t-stat      | 2.5883***      | 2.9688***      | 3.1178**       | 2.4199***      | 3.0666   |
|                    | DOLS coefficient  | 0.0267         | 0.3486         | 0.1691         | 0.0591         | 4.2287   |
|                    | DOLS t-stat       | 2.5890***      | 2.5852***      | 3.0664**       | 2.4087***      | 3.1129   |
| Dominican Republic | ARDL coefficient  | 0.0931         | 0.3892         | -0.1649        | 0.1284         | -5.3201  |
|                    | ARDL t-stat       | 3.5863***      | 3.2989***      | 2.0593***      | 3.9701***      | -4.4865  |
|                    | FMOLS coefficient | 0.0882         | 0.3563         | -0.1550        | 0.1592         | -5.0021  |
|                    | FMOLS t-stat      | 3.4456***      | 3.0674***      | 2.1675***      | 3.5826***      | -4.2354  |
|                    | DOLS coefficient  | 0.0970         | 0.3797         | -0.1773        | 0.1381         | -5.3378  |
|                    | DOLS t-stat       | 3.5868***      | 3.2593***      | 2.0646***      | 3.9882***      | -4.4997  |
| Ecuador            | ARDL coefficient  | 0.3987         | 0.1237         | 0.2900         | 0.5109         | 2.1995   |
|                    | ARDL t-stat       | 9.3866***      | 7.2000**       | -3.0482***     | -2.4975**      | 1.8202   |
|                    | FMOLS coefficient | 0.4285         | 0.1492         | 0.3031         | 0.5582         | 2.3049   |
|                    | FMOLS t-stat      | 8.0590***      | 7.0693**       | -2.9997***     | -2.5699**      | 1.9882   |
|                    | DOLS coefficient  | 0.4122         | 0.1320         | 0.2906         | 0.5287         | 2.2003   |
|                    | DOLS t-stat       | 9.0337***      | 7.3418**       | -3.0485***     | -2.5086**      | 1.8347   |
| Guatemala          | ARDL coefficient  | 0.1894         | 0.1748         | -0.3982        | 0.0473         | 4.9687   |
|                    | ARDL t-stat       | 5.9027**       | 5.3285**       | -1.9467*       | 4.2999*        | 3.9198   |
|                    | FMOLS coefficient | 0.2291         | 0.2390         | -0.5029        | 0.0727         | 4.7605   |
|                    | FMOLS t-stat      | 5.5003**       | 5.0492**       | -1.7895*       | 4.0052*        | 3.5977   |
|                    | DOLS coefficient  | 0.1929         | 0.1866         | -0.4006        | 0.0591         | 4.7992   |
|                    | DOLS t-stat       | 5.9167**       | 5.3263**       | -1.9530*       | 4.3087*        | 3.8845   |
| Iran               | ARDL coefficient  | -0.0480        | -0.4923        | -0.4888        | -0.0921        | 8.2977   |
|                    | ARDL t-stat       | 3.0875*        | 1.0480*        | -7.0024**      | 3.9612*        | 5.2831   |
|                    | FMOLS coefficient | -0.0445        | -0.4994        | -0.5690        | -0.0941        | 8.1167   |
|                    | FMOLS t-stat      | 2.9963*        | 1.1126*        | -6.8215**      | 3.8093*        | 5.2819   |
|                    | DOLS coefficient  | -0.0592        | -0.4829        | -0.4874        | -0.0884        | 8.0034   |
|                    | DOLS t-stat       | 3.0994*        | 1.0558*        | -7.0020**      | 3.9519*        | 5.0582   |
| Iraq               | ARDL coefficient  | 0.0378         | 0.0372         | -0.9387        | 0.1029         | -1.3087  |
|                    | ARDL t-stat       | -5.9076**      | 3.5559**       | -3.0293*       | 1.9444**       | -1.0022  |
|                    | FMOLS coefficient | 0.0492         | 0.0599         | -0.8057        | 0.1393         | -1.4029  |
|                    | FMOLS t-stat      | -5.5020**      | 3.2918**       | -3.2801*       | 2.0001**       | -1.1855  |
|                    | DOLS coefficient  | 0.0420         | 0.0443         | -0.9491        | 0.1149         | -1.3192  |
|                    | DOLS t-stat       | -5.9147**      | 3.5692**       | -3.1194*       | 1.9467**       | -1.1793  |
| Jordan             | ARDL coefficient  | -0.0663        | 0.9275         | 0.0019         | 0.4991         | -3.9866  |
|                    | ARDL t-stat       | 4.5197*        | 5.2985***      | 4.6972**       | -7.2974***     | -2.3865  |
|                    | FMOLS coefficient | -0.0672        | 0.9426         | 0.0665         | 0.5591         | -3.0187  |
|                    | FMOLS t-stat      | 4.3091*        | 5.4029***      | 4.6722**       | -7.1197***     | -2.7023  |
|                    | DOLS coefficient  | -0.0554        | 0.9392         | 0.0391         | 0.5072         | -3.7724  |
|                    | DOLS t-stat       | 4.5219*        | 5.3026***      | 4.7084**       | -7.0053***     | -2.3502  |
| Lebanon            | ARDL coefficient  | 0.1865         | 0.7291         | 0.4195         | 0.5190         | -6.2971  |
|                    | ARDL t-stat       | 3.9777**       | 3.5937***      | 5.0021**       | -5.2741***     | -5.1989  |
|                    | FMOLS coefficient | 0.2038         | 0.7501         | 0.4928         | 0.5974         | -6.0029  |
|                    | FMOLS t-stat      | 3.5026**       | 3.3929***      | 5.0929**       | -5.2986***     | -5.2988  |
|                    | DOLS coefficient  | 0.1990         | 0.7167         | 0.4290         | 0.5228         | -6.3084  |
|                    | DOLS t-stat       | 3.9963**       | 3.5896***      | 5.0492**       | -5.2894***     | -5.2097  |
| Libya              | ARDL coefficient  | -0.1993        | 0.7398         | 0.0417         | 0.6719         | 7.1082   |
|                    | ARDL t-stat       | 4.0030**       | -2.5697***     | 3.0585***      | 2.0034***      | 4.0884   |
|                    | FMOLS coefficient | -0.2096        | 0.7585         | 0.1583         | 0.5880         | 6.8201   |

|           |                   |           |            |           |            |         |
|-----------|-------------------|-----------|------------|-----------|------------|---------|
| Namibia   | FMOLS t-stat      | 4.1299**  | -2.4406*** | 3.8771*** | 2.4389***  | 4.1004  |
|           | DOLS coefficient  | -0.1974   | 0.7492     | 0.1390    | 0.6756     | 7.0055  |
|           | DOLS t-stat       | 4.0502**  | -2.5550*** | 3.0663*** | 2.0592***  | 4.0619  |
|           | ARDL coefficient  | -0.4975   | 0.2745     | 0.1116    | 0.3001     | -2.9853 |
|           | ARDL t-stat       | -3.0052*  | 4.0032***  | -1.0470** | 4.2988***  | -1.0009 |
|           | FMOLS coefficient | -0.5003   | 0.2890     | 0.1255    | 0.3184     | -2.7028 |
| Peru      | FMOLS t-stat      | -2.9794*  | 4.1199***  | -1.2837** | 4.0920***  | -1.0493 |
|           | DOLS coefficient  | -0.4840   | 0.2821     | 0.1289    | 0.3053     | -2.9685 |
|           | DOLS t-stat       | -3.0097*  | 4.0173***  | -1.0571** | 4.2664***  | -1.0377 |
|           | ARDL coefficient  | 0.5030    | 0.4982     | 0.4927    | 0.0287     | 4.9082  |
|           | ARDL t-stat       | 5.3977*** | 7.2412**   | 3.0053*   | -2.9695*   | 1.0886  |
|           | FMOLS coefficient | 0.5290    | 0.5945     | 0.5428    | 0.0333     | 4.5297  |
| Sri Lanka | FMOLS t-stat      | 5.4029**  | 7.0031**   | 3.1924*   | -2.1876*   | 1.2402  |
|           | DOLS coefficient  | 0.5116    | 0.4584     | 0.4499    | 0.0383     | 4.9105  |
|           | DOLS t-stat       | 5.3803**  | 7.2559**   | 3.0109*   | -2.9555*   | 1.0957  |
|           | ARDL coefficient  | 0.2548    | -0.2655    | 0.5102    | -0.1859    | 6.0821  |
|           | ARDL t-stat       | -1.9642** | 1.5977*    | 5.2260*   | 9.4921**   | 4.0982  |
|           | FMOLS coefficient | 0.3384    | -0.3000    | 0.5358    | -0.1884    | 5.5085  |
| Turkey    | FMOLS t-stat      | -2.0985** | 1.6547*    | 5.0485*   | 8.4928**   | 4.2256  |
|           | DOLS coefficient  | 0.2749    | -0.2694    | 0.5299    | -0.1940    | 5.7028  |
|           | DOLS t-stat       | -1.9774** | 1.5602*    | 5.2346*   | 9.5229**   | 4.1993  |
|           | ARDL coefficient  | 0.0861    | 0.0826     | 0.3928    | 0.0182     | -5.9809 |
|           | ARDL t-stat       | 6.1864*   | 4.2909*    | -2.0532** | -2.1418*** | -4.9997 |
|           | FMOLS coefficient | 0.0985    | 0.0662     | 0.4181    | 0.0382     | -5.0495 |
|           | FMOLS t-stat      | 5.9001    | 4.5093     | -2.1285** | -2.1867*** | -4.4009 |
|           | DOLS coefficient  | 0.0873    | 0.0739     | 0.4006    | 0.0286     | -5.8846 |
|           | DOLS t-stat       | 6.1965*   | 4.3088*    | -2.0693** | -2.1529*** | -4.8201 |

$X_1$  = number of confirmed COVID-19 cases;  $X_2$  = balance of food trade;  $X_3$  = food inflation;  $X_4$  = currency exchange; \*, \*\*, \*\*\* = significance at 10% level, 5% level, and 1% level, respectively. Source: authors' development.

**Table S10.** TY causality test results, Group 1.

| Country                    | Parameters      | Y→X <sub>1</sub> | X <sub>1</sub> →Y | Y→X <sub>2</sub> | X <sub>2</sub> →Y | Y→X <sub>3</sub> | X <sub>3</sub> →Y | Y→X <sub>4</sub> | X <sub>4</sub> →Y |
|----------------------------|-----------------|------------------|-------------------|------------------|-------------------|------------------|-------------------|------------------|-------------------|
| Afghanistan                | Test statistics | 0.39             | 1.94              | 2.09             | 9.48              | 0.55             | 0.18              | 2.64             | 3.19              |
|                            | <i>p</i> value  | 0.49             | 0.33              | 0.31             | 0.06*             | 0.47             | 0.62              | 0.26             | 0.20              |
| Burkina Faso               | Test statistics | 5.40             | 9.16              | 4.69             | 5.10              | 0.97             | 2.53              | 8.18             | 27.05             |
|                            | <i>p</i> value  | 0.31             | 0.18              | 0.41             | 0.33              | 0.84             | 0.52              | 0.23             | 0.06*             |
| Chad                       | Test statistics | 12.37            | 4.47              | 6.01             | 9.13              | 8.05             | 21.04             | 0.96             | 2.11              |
|                            | <i>p</i> value  | 0.14             | 0.33              | 0.26             | 0.19              | 0.22             | 0.00**            | 0.77             | 0.42              |
| Congo, Democratic Republic | Test statistics | 5.32             | 1.11              | 7.15             | 4.04              | 3.18             | 17.28             | 8.14             | 10.43             |
|                            | <i>p</i> value  | 0.28             | 0.75              | 0.16             | 0.35              | 0.40             | 0.00**            | 0.13             | 0.07*             |
| Ethiopia                   | Test statistics | 2.07             | 6.22              | 0.19             | 3.08              | 1.95             | 10.55             | 0.66             | 2.16              |
|                            | <i>p</i> value  | 0.45             | 0.19              | 0.93             | 0.38              | 0.48             | 0.00***           | 0.79             | 0.43              |
| Guinea                     | Test statistics | 3.90             | 10.00             | 1.14             | 15.02             | 6.41             | 14.20             | 0.47             | 4.08              |
|                            | <i>p</i> value  | 0.36             | 0.15              | 0.66             | 0.00**            | 0.26             | 0.01*             | 0.91             | 0.34              |
| Haiti                      | Test statistics | 2.28             | 3.11              | 1.05             | 8.39              | 2.02             | 4.13              | 1.59             | 0.72              |
|                            | <i>p</i> value  | 0.35             | 0.23              | 0.56             | 0.00**            | 0.38             | 0.17              | 0.41             | 0.77              |
| Mali                       | Test statistics | 2.18             | 11.63             | 0.44             | 1.17              | 0.16             | 5.14              | 0.98             | 7.00              |
|                            | <i>p</i> value  | 0.13             | 0.00*             | 0.41             | 0.20              | 0.92             | 0.06              | 0.23             | 0.03*             |
| Mozambique                 | Test statistics | 0.30             | 3.01              | 2.12             | 6.54              | 0.14             | 4.13              | 0.56             | 1.19              |
|                            | <i>p</i> value  | 0.72             | 0.23              | 0.30             | 0.02*             | 0.91             | 0.15              | 0.61             | 0.47              |
| Nepal                      | Test statistics | 2.01             | 6.38              | 0.58             | 3.12              | 1.66             | 0.97              | 0.14             | 4.75              |
|                            | <i>p</i> value  | 0.18             | 0.03*             | 0.69             | 0.10              | 0.25             | 0.41              | 0.90             | 0.07*             |
| Niger                      | Test statistics | 1.05             | 17.20             | 1.75             | 5.06              | 0.58             | 2.10              | 0.22             | 9.12              |
|                            | <i>p</i> value  | 0.53             | 0.00**            | 0.39             | 0.15              | 0.67             | 0.34              | 0.88             | 0.06*             |
| Sierra Leone               | Test statistics | 0.80             | 6.64              | 4.04             | 11.17             | 0.44             | 14.29             | 1.07             | 2.63              |
|                            | <i>p</i> value  | 0.84             | 0.11              | 0.20             | 0.03*             | 0.92             | 0.01**            | 0.75             | 0.34              |
| Tajikistan                 | Test statistics | 1.29             | 3.13              | 0.18             | 16.20             | 1.03             | 13.84             | 0.53             | 8.66              |
|                            | <i>p</i> value  | 0.45             | 0.21              | 0.82             | 0.00**            | 0.48             | 0.05**            | 0.76             | 0.08*             |
| Tanzania                   | Test statistics | 7.17             | 20.40             | 0.81             | 4.05              | 2.19             | 37.08             | 0.44             | 1.07              |
|                            | <i>p</i> value  | 0.22             | 0.09              | 0.75             | 0.34              | 0.55             | 0.00**            | 0.83             | 0.71              |
| Yemen                      | Test statistics | 1.00             | 13.17             | 0.08             | 8.16              | 1.98             | 4.13              | 0.35             | 0.86              |
|                            | <i>p</i> value  | 0.53             | 0.00*             | 0.94             | 0.02**            | 0.27             | 0.11              | 0.76             | 0.59              |

Y = number of people with insufficient food consumption; X<sub>1</sub> = number of confirmed COVID-19 cases; X<sub>2</sub> = balance of food trade; X<sub>3</sub> = food inflation; X<sub>4</sub> = currency exchange; \*, \*\*, \*\*\* = significance at 10% level, 5% level, and 1% level, respectively. Source: authors' development.

**Table S11.** TY causality test results, Group 2.

| Country       | Parameters      | Y→X <sub>1</sub> | X <sub>1</sub> →Y | Y→X <sub>2</sub> | X <sub>2</sub> →Y | Y→X <sub>3</sub> | X <sub>3</sub> →Y | Y→X <sub>4</sub> | X <sub>4</sub> →Y |
|---------------|-----------------|------------------|-------------------|------------------|-------------------|------------------|-------------------|------------------|-------------------|
| Bangladesh    | Test statistics | 0.68             | 8.13              | 0.99             | 4.36              | 0.14             | 2.01              | 0.05             | 1.16              |
|               | <i>p</i> value  | 0.41             | 0.00**            | 0.30             | 0.07              | 0.70             | 0.18              | 0.96             | 0.27              |
| Bolivia       | Test statistics | 1.16             | 7.07              | 0.75             | 4.19              | 2.03             | 8.55              | 0.10             | 0.17              |
|               | <i>p</i> value  | 0.33             | 0.02*             | 0.47             | 0.11              | 0.25             | 0.00*             | 0.84             | 0.80              |
| Cambodia      | Test statistics | 0.20             | 3.00              | 0.28             | 2.65              | 1.04             | 6.14              | 0.55             | 0.96              |
|               | <i>p</i> value  | 0.77             | 0.08              | 0.71             | 0.14              | 0.32             | 0.00*             | 0.46             | 0.37              |
| Cameroon      | Test statistics | 0.52             | 5.15              | 0.33             | 13.07             | 0.96             | 3.02              | 0.12             | 1.44              |
|               | <i>p</i> value  | 0.49             | 0.11              | 0.58             | 0.00**            | 0.35             | 0.17              | 0.79             | 0.26              |
| Cote d'Ivoire | Test statistics | 0.13             | 4.10              | 1.19             | 2.75              | 0.41             | 12.43             | 1.02             | 7.22              |
|               | <i>p</i> value  | 0.90             | 0.08              | 0.30             | 0.21              | 0.76             | 0.00**            | 0.34             | 0.01*             |
| India         | Test statistics | 0.37             | 23.15             | 0.55             | 6.12              | 1.12             | 2.08              | 1.76             | 15.06             |
|               | <i>p</i> value  | 0.83             | 0.00***           | 0.79             | 0.13              | 0.47             | 0.32              | 0.39             | 0.01*             |
| Indonesia     | Test statistics | 0.85             | 10.28             | 1.00             | 1.29              | 0.22             | 7.36              | 0.04             | 5.15              |
|               | <i>p</i> value  | 0.31             | 0.00***           | 0.23             | 0.16              | 0.65             | 0.01*             | 0.90             | 0.02*             |
| Kenya         | Test statistics | 0.67             | 6.11              | 0.24             | 6.88              | 1.02             | 6.00              | 1.31             | 2.03              |
|               | <i>p</i> value  | 0.46             | 0.01**            | 0.72             | 0.00**            | 0.29             | 0.02*             | 0.24             | 0.11              |
| Kyrgyzstan    | Test statistics | 1.13             | 2.05              | 1.60             | 7.17              | 0.53             | 8.23              | 1.02             | 0.80              |
|               | <i>p</i> value  | 0.34             | 0.12              | 0.23             | 0.00**            | 0.65             | 0.00**            | 0.37             | 0.41              |
| Nigeria       | Test statistics | 0.15             | 9.70              | 0.41             | 3.85              | 1.40             | 10.05             | 0.06             | 0.97              |
|               | <i>p</i> value  | 0.77             | 0.02**            | 0.56             | 0.10              | 0.22             | 0.00**            | 0.81             | 0.29              |
| Pakistan      | Test statistics | 0.08             | 3.19              | 0.20             | 1.07              | 0.85             | 6.13              | 0.48             | 14.63             |
|               | <i>p</i> value  | 0.92             | 0.25              | 0.81             | 0.42              | 0.49             | 0.14              | 0.66             | 0.00**            |
| Philippines   | Test statistics | 0.89             | 4.24              | 0.74             | 16.30             | 1.15             | 10.47             | 0.33             | 2.01              |
|               | <i>p</i> value  | 0.47             | 0.14              | 0.55             | 0.01***           | 0.42             | 0.03**            | 0.78             | 0.30              |
| Tunisia       | Test statistics | 0.18             | 3.03              | 0.26             | 12.98             | 0.09             | 9.13              | 0.60             | 1.24              |
|               | <i>p</i> value  | 0.72             | 0.11              | 0.67             | 0.00***           | 0.90             | 0.01**            | 0.51             | 0.25              |
| Vietnam       | Test statistics | 0.44             | 0.70              | 0.02             | 2.01              | 0.05             | 5.65              | 0.14             | 1.18              |
|               | <i>p</i> value  | 0.56             | 0.34              | 0.95             | 0.13              | 0.86             | 0.00**            | 0.77             | 0.22              |
| Zambia        | Test statistics | 0.33             | 0.52              | 0.21             | 3.30              | 0.97             | 7.04              | 0.09             | 1.24              |
|               | <i>p</i> value  | 0.65             | 0.57              | 0.74             | 0.14              | 0.41             | 0.01**            | 0.88             | 0.30              |

Y = number of people with insufficient food consumption; X<sub>1</sub> = number of confirmed COVID-19 cases; X<sub>2</sub> = balance of food trade; X<sub>3</sub> = food inflation; X<sub>4</sub> = currency exchange; \*, \*\*, \*\*\* = significance at 10% level, 5% level, and 1% level, respectively. Source: authors' development.

Table S12. TY causality test results, Group 3.

| Country            | Parameters      | Y→X <sub>1</sub> | X <sub>1</sub> →Y | Y→X <sub>2</sub> | X <sub>2</sub> →Y | Y→X <sub>3</sub> | X <sub>3</sub> →Y | Y→X <sub>4</sub> | X <sub>4</sub> →Y |
|--------------------|-----------------|------------------|-------------------|------------------|-------------------|------------------|-------------------|------------------|-------------------|
| Algeria            | Test statistics | 0.44             | 12.01             | 0.98             | 10.43             | 1.65             | 4.04              | 0.12             | 2.77              |
|                    | <i>p</i> value  | 0.56             | 0.00**            | 0.37             | 0.01***           | 0.29             | 0.11              | 0.87             | 0.20              |
| Botswana           | Test statistics | 0.20             | 3.70              | 0.49             | 13.67             | 0.94             | 1.99              | 1.05             | 9.14              |
|                    | <i>p</i> value  | 0.77             | 0.13              | 0.58             | 0.00***           | 0.39             | 0.24              | 0.36             | 0.01***           |
| Colombia           | Test statistics | 0.73             | 32.18             | 4.01             | 25.40             | 2.11             | 9.13              | 1.40             | 19.46             |
|                    | <i>p</i> value  | 0.81             | 0.00***           | 0.24             | 0.01***           | 0.38             | 0.10              | 0.66             | 0.02***           |
| Dominican Republic | Test statistics | 0.04             | 9.74              | 0.72             | 2.18              | 0.13             | 1.06              | 0.85             | 7.03              |
|                    | <i>p</i> value  | 0.92             | 0.00**            | 0.34             | 0.11              | 0.75             | 0.23              | 0.29             | 0.01***           |
| Ecuador            | Test statistics | 0.85             | 19.13             | 0.31             | 5.25              | 1.80             | 11.20             | 1.03             | 2.17              |
|                    | <i>p</i> value  | 0.46             | 0.00***           | 0.69             | 0.12              | 0.31             | 0.02*             | 0.40             | 0.25              |
| Guatemala          | Test statistics | 0.12             | 0.95              | 0.44             | 7.14              | 1.03             | 2.19              | 0.21             | 1.44              |
|                    | <i>p</i> value  | 0.85             | 0.34              | 0.47             | 0.00**            | 0.31             | 0.15              | 0.66             | 0.26              |
| Iran               | Test statistics | 0.24             | 12.07             | 0.85             | 6.25              | 0.40             | 1.02              | 1.55             | 2.07              |
|                    | <i>p</i> value  | 0.81             | 0.00**            | 0.56             | 0.13              | 0.72             | 0.42              | 0.36             | 0.30              |
| Iraq               | Test statistics | 0.09             | 1.66              | 1.05             | 5.80              | 0.19             | 0.81              | 0.38             | 0.62              |
|                    | <i>p</i> value  | 0.83             | 0.18              | 0.23             | 0.02**            | 0.65             | 0.28              | 0.47             | 0.34              |
| Jordan             | Test statistics | 1.04             | 4.55              | 0.88             | 18.25             | 1.38             | 12.46             | 0.20             | 2.17              |
|                    | <i>p</i> value  | 0.37             | 0.12              | 0.42             | 0.00***           | 0.30             | 0.01*             | 0.79             | 0.21              |
| Lebanon            | Test statistics | 0.06             | 1.36              | 0.99             | 8.14              | 0.81             | 6.09              | 0.14             | 0.43              |
|                    | <i>p</i> value  | 0.92             | 0.14              | 0.25             | 0.00***           | 0.28             | 0.01*             | 0.75             | 0.51              |
| Libya              | Test statistics | 0.11             | 3.03              | 0.30             | 10.02             | 1.40             | 1.83              | 0.62             | 0.80              |
|                    | <i>p</i> value  | 0.84             | 0.10              | 0.64             | 0.01***           | 0.24             | 0.19              | 0.49             | 0.45              |
| Namibia            | Test statistics | 0.39             | 0.67              | 1.21             | 9.27              | 0.97             | 7.23              | 0.81             | 6.08              |
|                    | <i>p</i> value  | 0.58             | 0.41              | 0.13             | 0.00***           | 0.25             | 0.01*             | 0.34             | 0.02***           |
| Peru               | Test statistics | 0.17             | 14.19             | 0.50             | 10.34             | 1.04             | 2.15              | 0.77             | 8.40              |
|                    | <i>p</i> value  | 0.72             | 0.00***           | 0.55             | 0.01*             | 0.27             | 0.13              | 0.39             | 0.02***           |
| Sri Lanka          | Test statistics | 0.15             | 9.08              | 0.32             | 1.13              | 0.93             | 5.12              | 0.55             | 4.00              |
|                    | <i>p</i> value  | 0.80             | 0.00***           | 0.67             | 0.15              | 0.21             | 0.01*             | 0.48             | 0.02***           |
| Turkey             | Test statistics | 0.28             | 15.06             | 0.44             | 2.17              | 1.55             | 10.41             | 0.96             | 9.35              |
|                    | <i>p</i> value  | 0.74             | 0.00***           | 0.58             | 0.16              | 0.24             | 0.01**            | 0.31             | 0.02***           |

Y = number of people with insufficient food consumption; X<sub>1</sub> = number of confirmed COVID-19 cases; X<sub>2</sub> = balance of food trade; X<sub>3</sub> = food inflation; X<sub>4</sub> = currency exchange; \*, \*\*, \*\*\* = significance at 10% level, 5% level, and 1% level, respectively. Source: authors' development.

**Table S13.** Variance decomposition of Y over a nine periods (three quarters) horizon, Group 1.

| Country                    | Period         | Standard error | Y         | X <sub>1</sub> | X <sub>2</sub> | X <sub>3</sub> | X <sub>4</sub> |
|----------------------------|----------------|----------------|-----------|----------------|----------------|----------------|----------------|
| Afghanistan                | September 2020 | 0.004726       | 93.178533 | 0.310963       | 4.889038       | 0.012871       | 1.608595       |
|                            | December 2020  | 0.007688       | 88.899731 | 1.902381       | 5.904815       | 0.009842       | 3.283231       |
|                            | March 2021     | 0.012864       | 83.982772 | 2.159286       | 8.007200       | 0.008275       | 5.842467       |
| Burkina Faso               | September 2020 | 0.003719       | 95.829400 | 0.499841       | 0.994106       | 0.031578       | 2.645075       |
|                            | December 2020  | 0.005851       | 89.492855 | 3.159844       | 0.752981       | 0.149811       | 6.444509       |
|                            | March 2021     | 0.010509       | 84.203371 | 5.809420       | 0.707732       | 0.266082       | 9.013395       |
| Chad                       | September 2020 | 0.006187       | 92.178925 | 0.586849       | 1.568395       | 5.498254       | 0.167577       |
|                            | December 2020  | 0.008468       | 82.400067 | 2.377412       | 4.189734       | 10.309615      | 0.723172       |
|                            | March 2021     | 0.011921       | 76.398555 | 3.096329       | 5.095246       | 13.704832      | 1.705038       |
| Congo, Democratic Republic | September 2020 | 0.007164       | 94.117593 | 0.042881       | 0.808432       | 3.177245       | 1.853849       |
|                            | December 2020  | 0.013877       | 90.058290 | 0.061299       | 0.504914       | 5.909843       | 3.465654       |
|                            | March 2021     | 0.021955       | 81.174509 | 0.078531       | 0.439886       | 11.120942      | 7.186132       |
| Ethiopia                   | September 2020 | 0.010297       | 93.148096 | 1.309442       | 0.320833       | 5.100985       | 0.120644       |
|                            | December 2020  | 0.014958       | 85.109844 | 1.580413       | 1.225821       | 10.579216      | 1.504706       |
|                            | March 2021     | 0.021870       | 77.739052 | 1.690286       | 3.000632       | 14.840523      | 2.729507       |
| Guinea                     | September 2020 | 0.009421       | 92.203361 | 1.009850       | 3.172805       | 2.849863       | 0.764121       |
|                            | December 2020  | 0.015924       | 84.640840 | 1.202587       | 7.404022       | 6.403445       | 0.349106       |
|                            | March 2021     | 0.020071       | 73.129065 | 2.009524       | 12.511563      | 11.505621      | 0.844227       |
| Haiti                      | September 2020 | 0.008419       | 95.148984 | 0.704533       | 3.405712       | 0.498423       | 0.242348       |
|                            | December 2020  | 0.013957       | 88.350902 | 2.567071       | 6.139209       | 1.309884       | 1.632934       |
|                            | March 2021     | 0.017299       | 80.772309 | 3.120067       | 11.042261      | 2.522567       | 2.542796       |
| Mali                       | September 2020 | 0.028555       | 94.909951 | 2.084932       | 0.042220       | 0.438975       | 2.523922       |
|                            | December 2020  | 0.034800       | 89.048255 | 5.156625       | 0.068285       | 0.707532       | 5.019303       |
|                            | March 2021     | 0.041985       | 82.455084 | 9.126083       | 0.099321       | 0.598340       | 7.721172       |
| Mozambique                 | September 2020 | 0.005680       | 98.028851 | 0.199874       | 1.117972       | 0.407162       | 0.246141       |
|                            | December 2020  | 0.007996       | 96.538923 | 0.219085       | 1.248065       | 0.289875       | 1.704052       |
|                            | March 2021     | 0.010077       | 93.119874 | 0.259874       | 2.802876       | 0.209876       | 3.607500       |
| Nepal                      | September 2020 | 0.037945       | 94.894071 | 3.170932       | 0.289403       | 0.049841       | 1.595753       |
|                            | December 2020  | 0.043886       | 87.095286 | 6.809884       | 0.309724       | 0.059875       | 5.725231       |
|                            | March 2021     | 0.052893       | 79.479210 | 10.290955      | 0.552986       | 0.069951       | 9.606898       |
| Niger                      | September 2020 | 0.004526       | 95.001758 | 2.502111       | 0.904713       | 0.147804       | 1.443614       |
|                            | December 2020  | 0.008270       | 88.358921 | 6.142203       | 1.005892       | 0.170987       | 4.321997       |
|                            | March 2021     | 0.013877       | 82.086743 | 9.459286       | 1.580396       | 0.225803       | 6.647772       |
| Sierra Leone               | September 2020 | 0.009884       | 96.400027 | 0.189775       | 1.009974       | 2.323875       | 0.076349       |
|                            | December 2020  | 0.016872       | 93.116405 | 0.540096       | 1.130843       | 4.950972       | 0.261684       |
|                            | March 2021     | 0.027881       | 90.400933 | 0.833309       | 1.308875       | 6.912865       | 0.544018       |
| Tajikistan                 | September 2020 | 0.001873       | 92.415807 | 0.084925       | 4.058277       | 2.140723       | 1.300268       |
|                            | December 2020  | 0.004920       | 85.190287 | 0.113067       | 9.409287       | 4.086287       | 1.201072       |
|                            | March 2021     | 0.008344       | 77.097630 | 0.140992       | 14.006000      | 7.528751       | 1.226627       |
| Tanzania                   | September 2020 | 0.003835       | 95.230875 | 0.905298       | 0.428515       | 3.258826       | 0.176486       |
|                            | December 2020  | 0.008006       | 91.360922 | 1.230954       | 0.666192       | 6.003710       | 0.738222       |
|                            | March 2021     | 0.013774       | 87.110943 | 1.503985       | 1.003985       | 9.294986       | 1.086101       |
| Yemen                      | September 2020 | 0.004217       | 96.370849 | 2.029486       | 1.398412       | 0.197746       | 0.003507       |
|                            | December 2020  | 0.007399       | 93.029871 | 5.391854       | 1.209864       | 0.308592       | 0.059819       |
|                            | March 2021     | 0.013985       | 89.427849 | 8.298401       | 1.332875       | 0.808521       | 0.132354       |

Y = number of people with insufficient food consumption; X<sub>1</sub> = number of confirmed COVID-19 cases; X<sub>2</sub> = balance of food trade; X<sub>3</sub> = food inflation; X<sub>4</sub> = currency exchange. Source: authors' development



**Table S14.** Variance decomposition of Y over a nine periods (three quarters) horizon, Group 2.

| Country       | Period         | Standard error | Y         | X <sub>1</sub> | X <sub>2</sub> | X <sub>3</sub> | X <sub>4</sub> |
|---------------|----------------|----------------|-----------|----------------|----------------|----------------|----------------|
| Bangladesh    | September 2020 | 0.007390       | 95.370145 | 3.038921       | 0.835521       | 0.405194       | 0.350219       |
|               | December 2020  | 0.009186       | 88.409283 | 8.309127       | 1.492300       | 0.951096       | 0.838194       |
|               | March 2021     | 0.013909       | 82.559531 | 12.095140      | 2.649302       | 1.305821       | 1.390206       |
| Bolivia       | September 2020 | 0.004008       | 93.094854 | 2.179285       | 0.304875       | 4.382022       | 0.038964       |
|               | December 2020  | 0.006927       | 85.104820 | 4.539953       | 1.707328       | 8.626945       | 0.020954       |
|               | March 2021     | 0.012815       | 79.372041 | 4.629850       | 1.920584       | 14.059184      | 0.018341       |
| Cambodia      | September 2020 | 0.008510       | 94.072918 | 0.850211       | 0.670913       | 4.297705       | 0.108253       |
|               | December 2020  | 0.011904       | 86.349271 | 1.590932       | 1.298584       | 10.110627      | 0.650586       |
|               | March 2021     | 0.015991       | 80.230950 | 1.904863       | 1.840276       | 15.270843      | 0.753068       |
| Cameroon      | September 2020 | 0.004896       | 96.398705 | 0.492125       | 2.509110       | 0.402782       | 0.197278       |
|               | December 2020  | 0.008733       | 94.180437 | 0.908814       | 3.622819       | 0.763986       | 0.523944       |
|               | March 2021     | 0.013005       | 91.309665 | 1.205985       | 5.389833       | 1.110321       | 0.984196       |
| Cote d'Ivoire | September 2020 | 0.011437       | 92.148064 | 0.039844       | 0.001965       | 4.297180       | 3.512947       |
|               | December 2020  | 0.015042       | 85.002978 | 0.088301       | 0.002600       | 7.603291       | 7.302830       |
|               | March 2021     | 0.020046       | 77.169285 | 0.105932       | 0.005928       | 12.437220      | 10.281635      |
| India         | September 2020 | 0.006281       | 93.048772 | 3.793780       | 0.084725       | 0.005921       | 3.066802       |
|               | December 2020  | 0.009942       | 80.279901 | 10.841954      | 0.009486       | 0.003912       | 8.864747       |
|               | March 2021     | 0.014244       | 74.194296 | 14.498776      | 0.003910       | 0.002030       | 11.300988      |
| Indonesia     | September 2020 | 0.005530       | 95.117295 | 1.903875       | 0.329855       | 1.527541       | 1.121434       |
|               | December 2020  | 0.008408       | 90.930758 | 3.010410       | 0.450849       | 2.819885       | 2.788098       |
|               | March 2021     | 0.010727       | 84.503985 | 5.529514       | 0.662976       | 5.028401       | 4.275124       |
| Kenya         | September 2020 | 0.013166       | 92.004956 | 2.270498       | 3.427501       | 2.004976       | 0.292069       |
|               | December 2020  | 0.020574       | 85.384109 | 4.389875       | 6.840035       | 2.883090       | 0.502891       |
|               | March 2021     | 0.028218       | 79.403770 | 6.147930       | 10.131840      | 3.620996       | 0.695464       |
| Kyrgyzstan    | September 2020 | 0.031096       | 93.920471 | 0.505149       | 2.820951       | 2.709857       | 0.043572       |
|               | December 2020  | 0.049194       | 86.079288 | 1.301942       | 6.662188       | 5.908173       | 0.048409       |
|               | March 2021     | 0.061702       | 78.222960 | 1.839585       | 10.909382      | 8.969566       | 0.058507       |
| Nigeria       | September 2020 | 0.010025       | 97.481042 | 0.707928       | 0.392665       | 1.336629       | 0.081736       |
|               | December 2020  | 0.015036       | 94.120953 | 1.259744       | 0.780482       | 3.703420       | 0.135401       |
|               | March 2021     | 0.020738       | 90.893655 | 1.936021       | 0.928777       | 6.059754       | 0.181793       |
| Pakistan      | September 2020 | 0.002915       | 96.529501 | 0.078375       | 0.038860       | 0.250285       | 3.102979       |
|               | December 2020  | 0.004172       | 91.692750 | 0.050270       | 0.025827       | 0.508822       | 7.722331       |
|               | March 2021     | 0.005986       | 87.069273 | 0.046206       | 0.022041       | 0.936606       | 11.925874      |
| Philippines   | September 2020 | 0.011503       | 95.850002 | 0.102985       | 2.739824       | 1.269412       | 0.037777       |
|               | December 2020  | 0.014837       | 89.104877 | 0.260387       | 5.853920       | 4.503865       | 0.276951       |
|               | March 2021     | 0.019545       | 81.329586 | 0.449286       | 9.845090       | 7.971921       | 0.404117       |
| Tunisia       | September 2020 | 0.002694       | 96.027573 | 0.409219       | 1.960987       | 1.508863       | 0.093358       |
|               | December 2020  | 0.004885       | 88.560498 | 0.912876       | 5.340061       | 4.592095       | 0.594470       |
|               | March 2021     | 0.006603       | 82.324409 | 1.204828       | 8.328612       | 7.509287       | 0.632864       |
| Vietnam       | September 2020 | 0.003047       | 94.238894 | 0.008021       | 0.803267       | 4.380486       | 0.569332       |
|               | December 2020  | 0.003819       | 85.099286 | 0.010587       | 2.209864       | 11.220061      | 1.460202       |
|               | March 2021     | 0.004500       | 78.836502 | 0.013976       | 3.390510       | 15.984744      | 1.774268       |
| Zambia        | September 2020 | 0.012053       | 96.110253 | 0.009310       | 0.802976       | 2.797056       | 0.280405       |
|               | December 2020  | 0.017048       | 90.492870 | 0.012096       | 1.740965       | 7.089942       | 0.664127       |
|               | March 2021     | 0.022729       | 84.950397 | 0.023051       | 2.498600       | 11.598730      | 0.929222       |

Y = number of people with insufficient food consumption; X<sub>1</sub> = number of confirmed COVID-19 cases;  
X<sub>2</sub> = balance of food trade; X<sub>3</sub> = food inflation; X<sub>4</sub> = currency exchange. Source: authors' development.

**Table S15.** Variance decomposition of Y over a nine periods (three quarters) horizon, Group 3.

| Country            | Period         | Standard error | Y         | X <sub>1</sub> | X <sub>2</sub> | X <sub>3</sub> | X <sub>4</sub> |
|--------------------|----------------|----------------|-----------|----------------|----------------|----------------|----------------|
| Algeria            | September 2020 | 0.005105       | 93.194765 | 3.509961       | 3.029875       | 0.249287       | 0.016112       |
|                    | December 2020  | 0.006238       | 87.088402 | 5.439854       | 6.798271       | 0.602855       | 0.070618       |
|                    | March 2021     | 0.008429       | 80.398771 | 8.346723       | 10.459914      | 0.710592       | 0.084000       |
| Botswana           | September 2020 | 0.011730       | 95.459287 | 0.030952       | 2.329860       | 0.004293       | 2.175608       |
|                    | December 2020  | 0.013096       | 88.500233 | 0.043976       | 5.549811       | 0.006610       | 5.899370       |
|                    | March 2021     | 0.015387       | 81.003520 | 0.060293       | 9.049824       | 0.007298       | 9.879065       |
| Colombia           | September 2020 | 0.009473       | 92.984556 | 2.498662       | 2.285527       | 0.013853       | 2.217402       |
|                    | December 2020  | 0.015905       | 83.150851 | 6.339876       | 5.340298       | 0.039761       | 5.129214       |
|                    | March 2021     | 0.021376       | 75.425932 | 8.930194       | 7.770392       | 0.050030       | 7.823452       |
| Dominican Republic | September 2020 | 0.006604       | 96.660496 | 1.802844       | 0.009930       | 0.001976       | 1.524754       |
|                    | December 2020  | 0.011975       | 94.026822 | 3.005985       | 0.012850       | 0.027887       | 2.926456       |
|                    | March 2021     | 0.025400       | 92.339524 | 4.238772       | 0.016927       | 0.059364       | 3.345413       |
| Ecuador            | September 2020 | 0.003167       | 95.782758 | 2.347703       | 0.035723       | 1.809863       | 0.023953       |
|                    | December 2020  | 0.007341       | 91.298700 | 4.063911       | 0.266540       | 3.987576       | 0.383273       |
|                    | March 2021     | 0.009938       | 86.600382 | 6.909257       | 0.547101       | 5.145527       | 0.797733       |
| Guatemala          | September 2020 | 0.037076       | 96.212805 | 0.028660       | 2.598520       | 0.795872       | 0.364143       |
|                    | December 2020  | 0.058351       | 90.829811 | 0.050999       | 6.420056       | 1.903986       | 0.795148       |
|                    | March 2021     | 0.072956       | 85.628403 | 0.079375       | 9.739851       | 3.597704       | 0.954667       |
| Iran               | September 2020 | 0.015632       | 94.000470 | 3.850294       | 1.847442       | 0.008209       | 0.293585       |
|                    | December 2020  | 0.021693       | 88.198755 | 8.442958       | 2.756914       | 0.012985       | 0.588388       |
|                    | March 2021     | 0.028407       | 82.410007 | 12.438750      | 4.204920       | 0.017666       | 0.928657       |
| Iraq               | September 2020 | 0.003791       | 93.783922 | 0.108387       | 6.019842       | 0.079375       | 0.008474       |
|                    | December 2020  | 0.005839       | 84.837763 | 0.940842       | 13.639843      | 0.512097       | 0.069455       |
|                    | March 2021     | 0.007230       | 78.592855 | 2.375554       | 16.945677      | 1.604982       | 0.480932       |
| Jordan             | September 2020 | 0.017266       | 95.676044 | 0.023985       | 2.294875       | 1.999503       | 0.005593       |
|                    | December 2020  | 0.023404       | 89.039486 | 0.049583       | 6.259286       | 4.639504       | 0.012141       |
|                    | March 2021     | 0.030487       | 83.928051 | 0.062975       | 9.502850       | 6.482753       | 0.023371       |
| Lebanon            | September 2020 | 0.045509       | 97.456629 | 0.400398       | 1.179387       | 0.948655       | 0.014931       |
|                    | December 2020  | 0.059172       | 94.773892 | 0.689956       | 3.039866       | 1.399840       | 0.096446       |
|                    | March 2021     | 0.064096       | 91.054496 | 0.779287       | 6.249302       | 1.785744       | 0.131171       |
| Libya              | September 2020 | 0.005303       | 93.111590 | 1.029870       | 5.309978       | 0.501153       | 0.047409       |
|                    | December 2020  | 0.006092       | 82.529857 | 3.703998       | 12.649664      | 0.992501       | 0.123980       |
|                    | March 2021     | 0.008839       | 75.395602 | 5.123094       | 18.028750      | 1.139622       | 0.312932       |
| Namibia            | September 2020 | 0.015827       | 96.340698 | 0.004935       | 1.592873       | 1.200980       | 0.860514       |
|                    | December 2020  | 0.038094       | 85.288095 | 0.017948       | 6.660255       | 3.694053       | 4.339649       |
|                    | March 2021     | 0.057022       | 73.109873 | 0.038761       | 12.197768      | 6.329755       | 8.323843       |
| Peru               | September 2020 | 0.002504       | 92.039890 | 4.299756       | 2.019635       | 0.018720       | 1.621999       |
|                    | December 2020  | 0.003777       | 80.208444 | 9.029847       | 4.130297       | 0.029453       | 6.601959       |
|                    | March 2021     | 0.004920       | 71.559215 | 13.294860      | 6.200018       | 0.049841       | 8.896066       |
| Sri Lanka          | September 2020 | 0.004406       | 95.386875 | 1.950200       | 0.040941       | 1.597470       | 1.024514       |
|                    | December 2020  | 0.005003       | 92.454822 | 2.305974       | 0.062216       | 2.500146       | 2.676842       |
|                    | March 2021     | 0.005698       | 89.967249 | 3.260016       | 0.077295       | 2.809897       | 3.885543       |
| Turkey             | September 2020 | 0.002906       | 90.479904 | 4.110062       | 0.029873       | 2.848211       | 2.531950       |
|                    | December 2020  | 0.003351       | 79.502073 | 7.019281       | 0.049286       | 3.198602       | 10.230758      |
|                    | March 2021     | 0.003855       | 68.327048 | 11.309555      | 0.060337       | 5.089936       | 15.213124      |

Y = number of people with insufficient food consumption; X<sub>1</sub> = number of confirmed COVID-19 cases; X<sub>2</sub> = balance of food trade; X<sub>3</sub> = food inflation; X<sub>4</sub> = currency exchange. Source: authors' development.
